# Supplementary figures and images for: Facile one-pot synthesis of 4-substituted semicarbazides
Source: Royal Society of Chemistry journal article supplement (doi:10.1039/c4ra12425a), 2014-12-02

### NMR spectra of the synthesized compounds

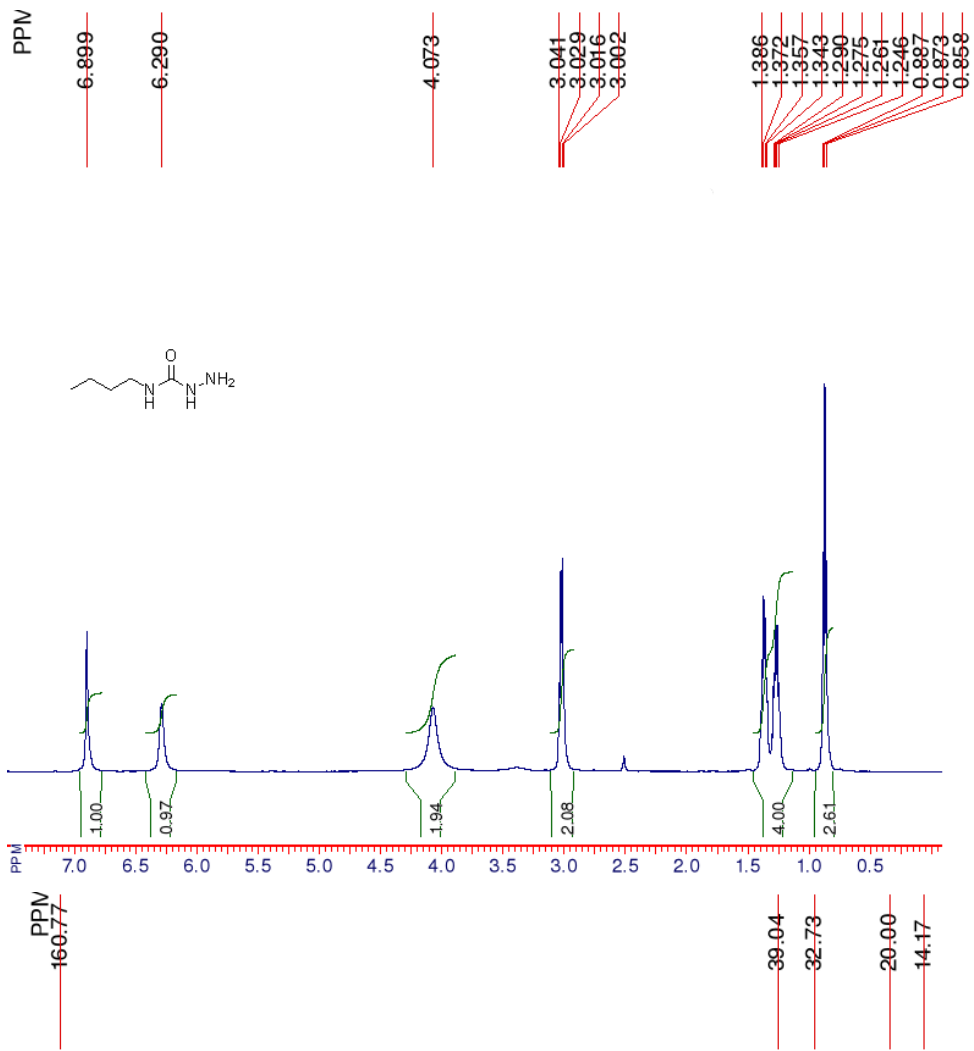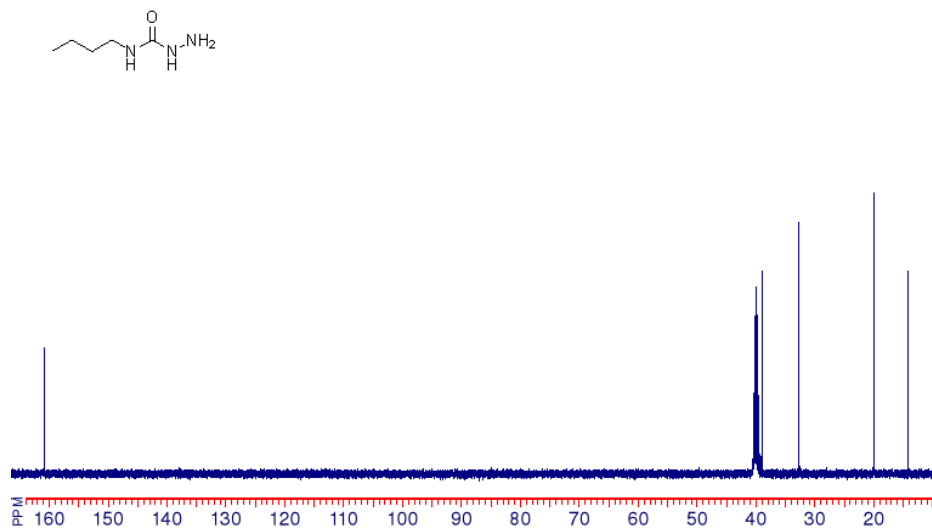

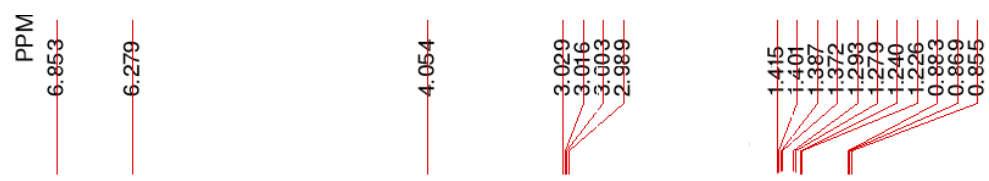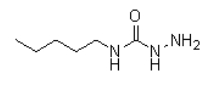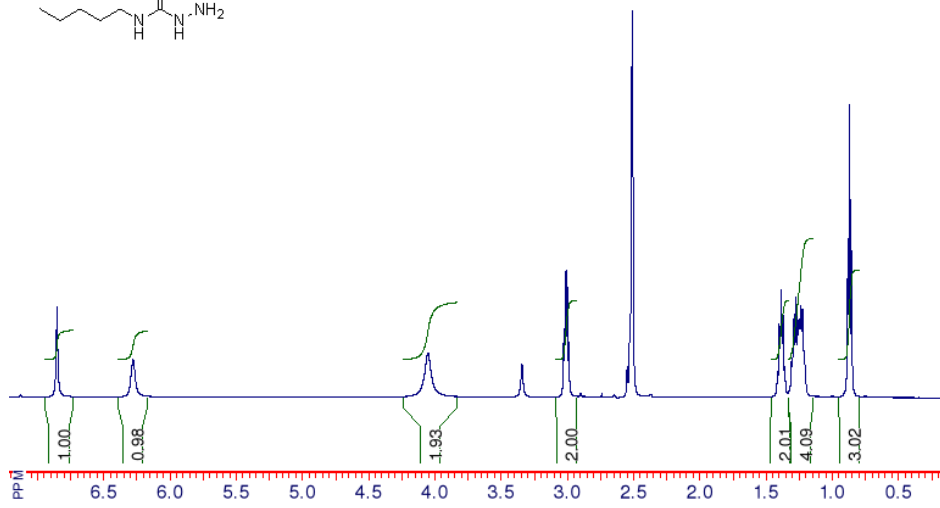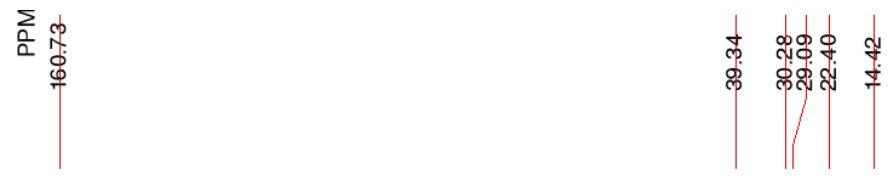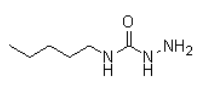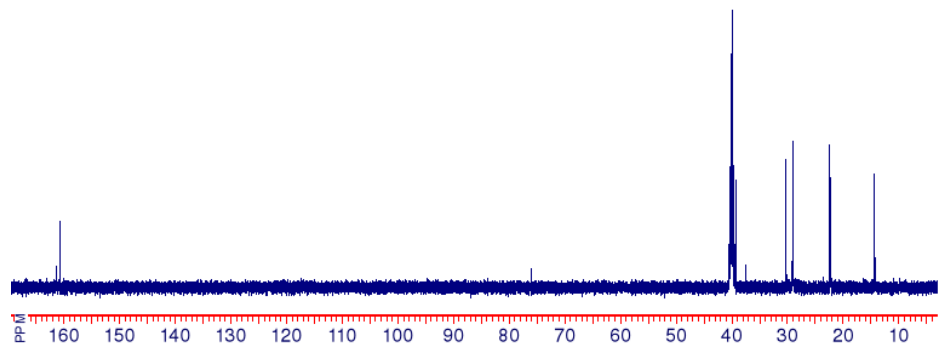

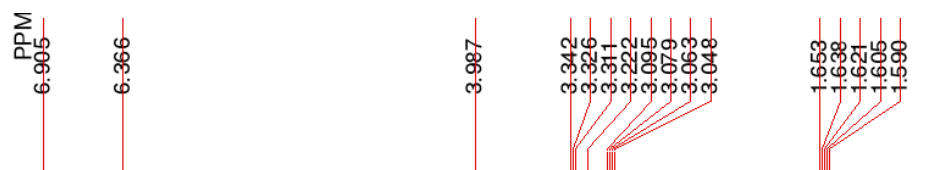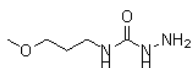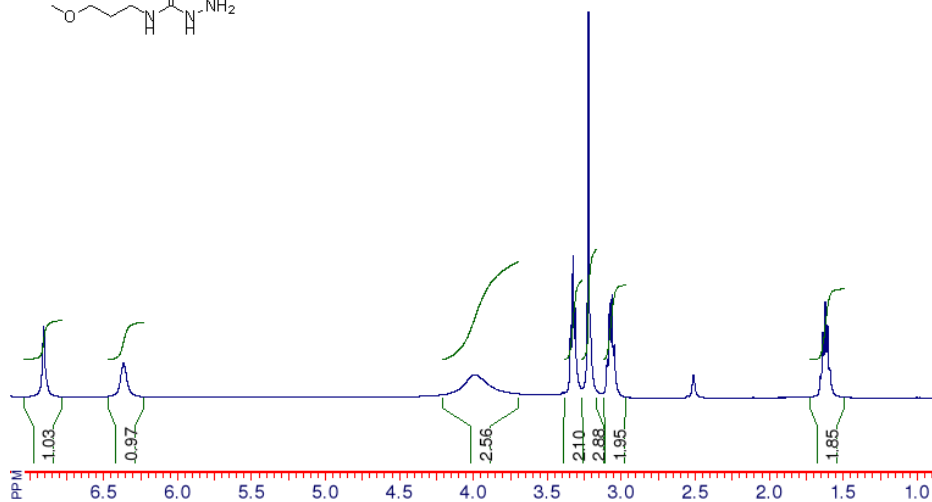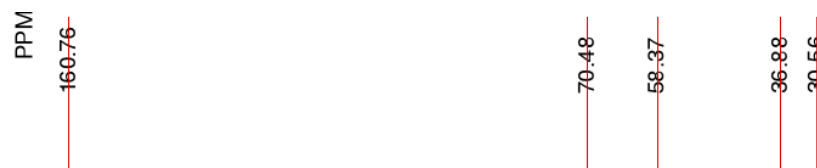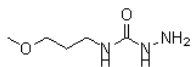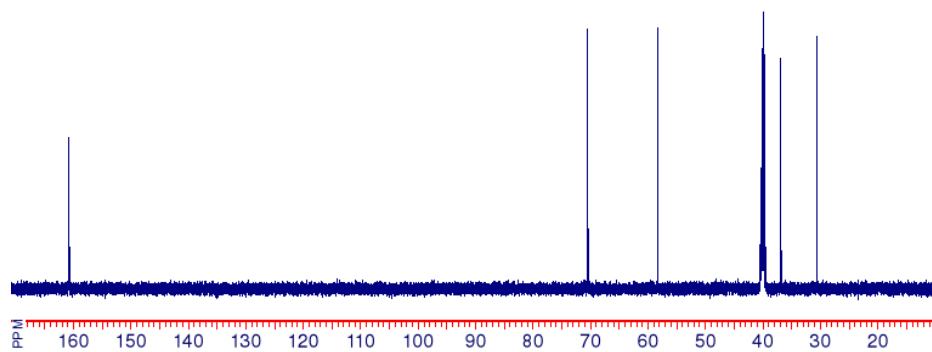

PPM

6.900

6.358

4.099

2.922

2.906

2.890

0.930

0.917

0.900

0.888

0.871

0.855

0.841

0.823

0.149

0.138

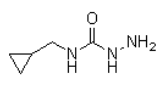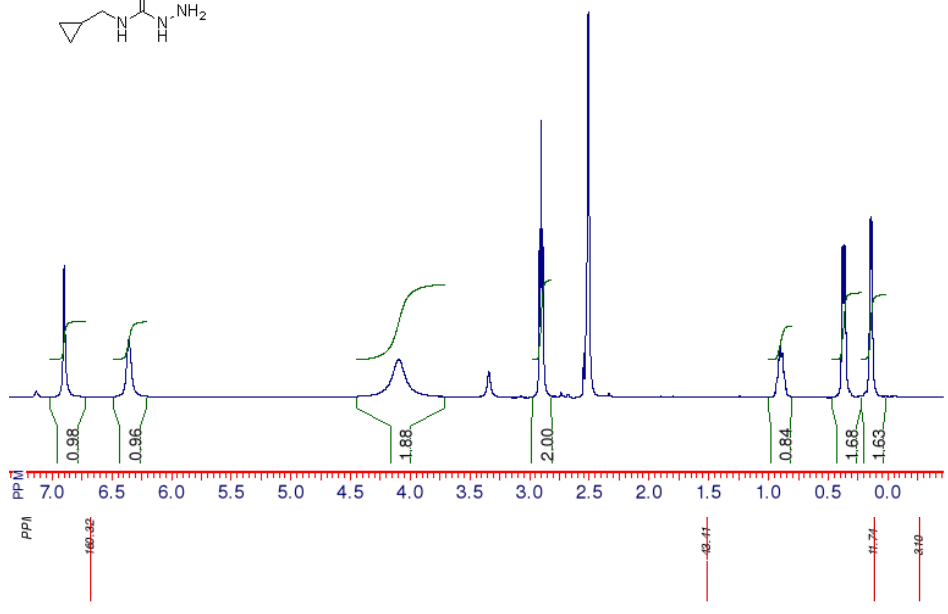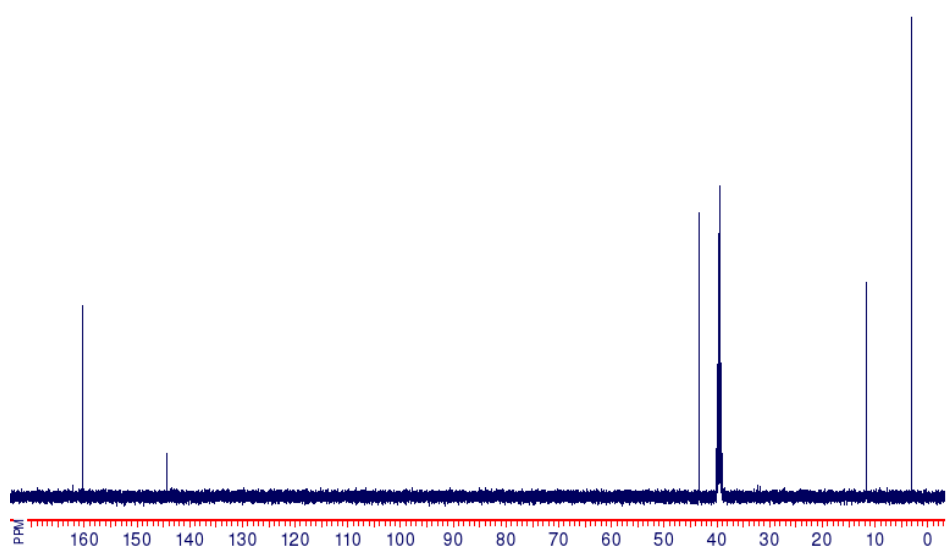

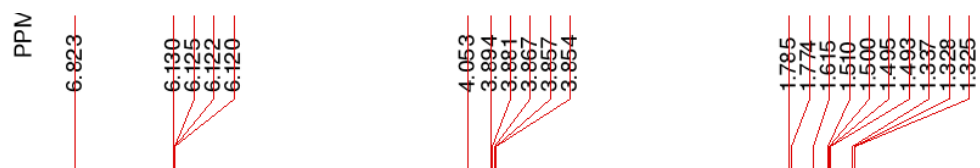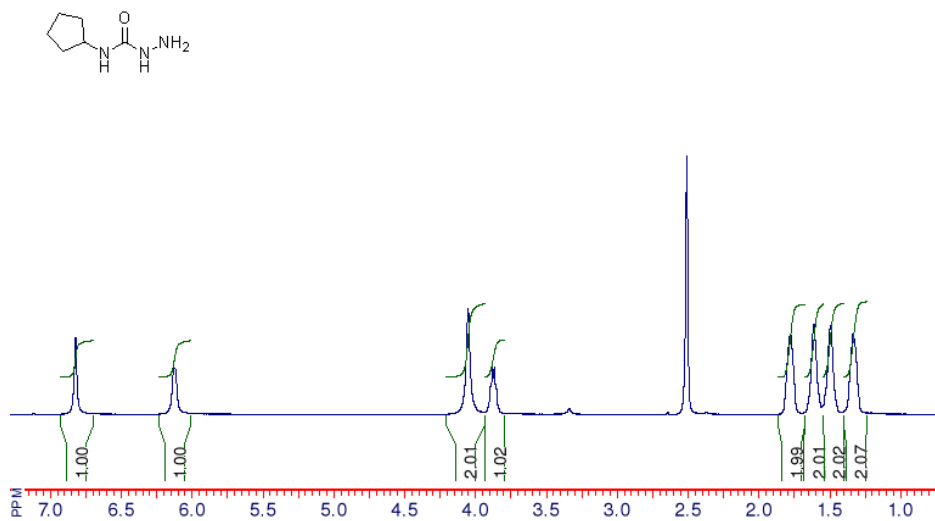

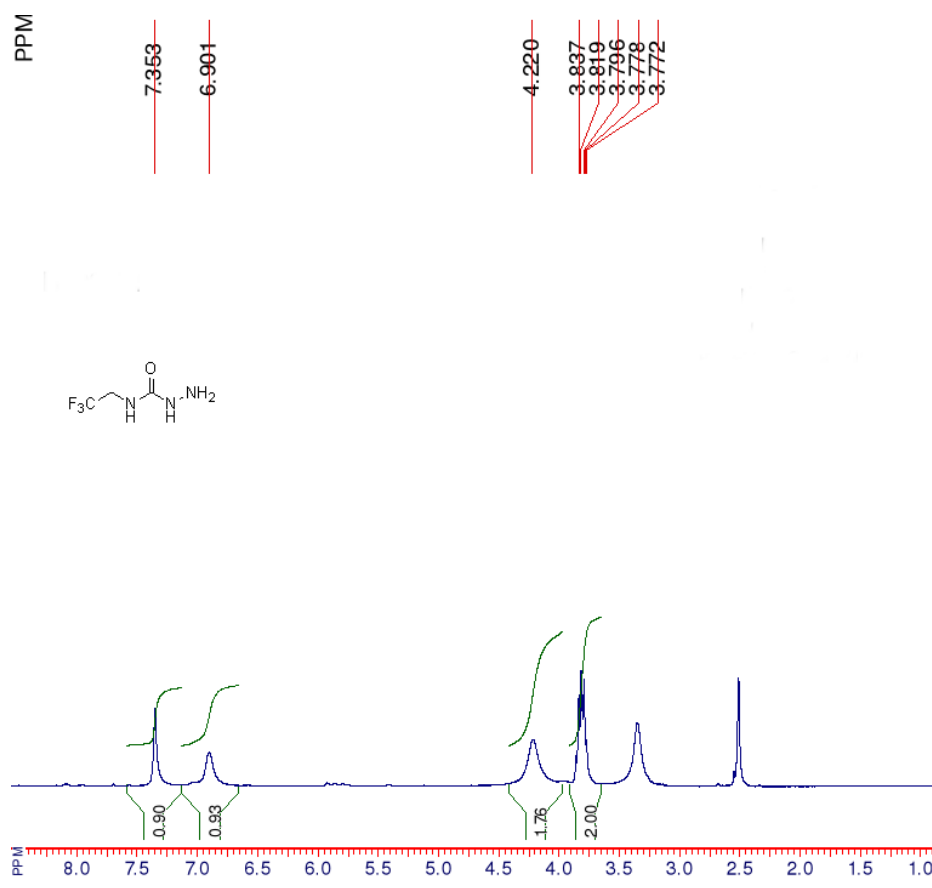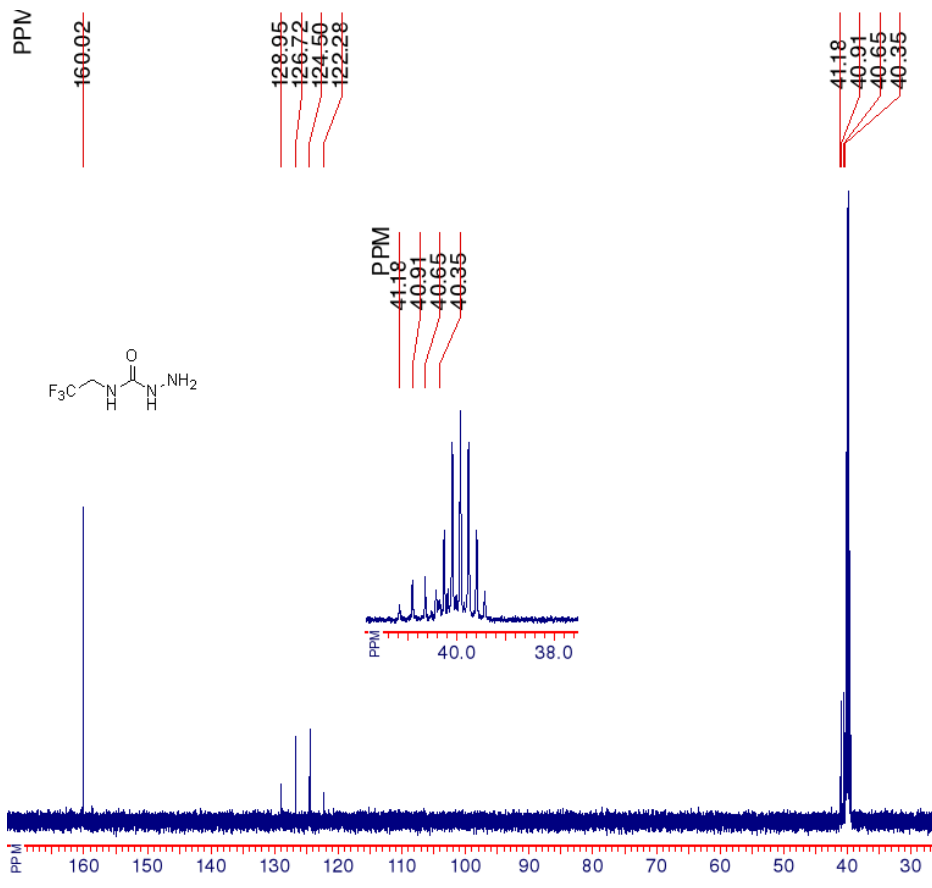

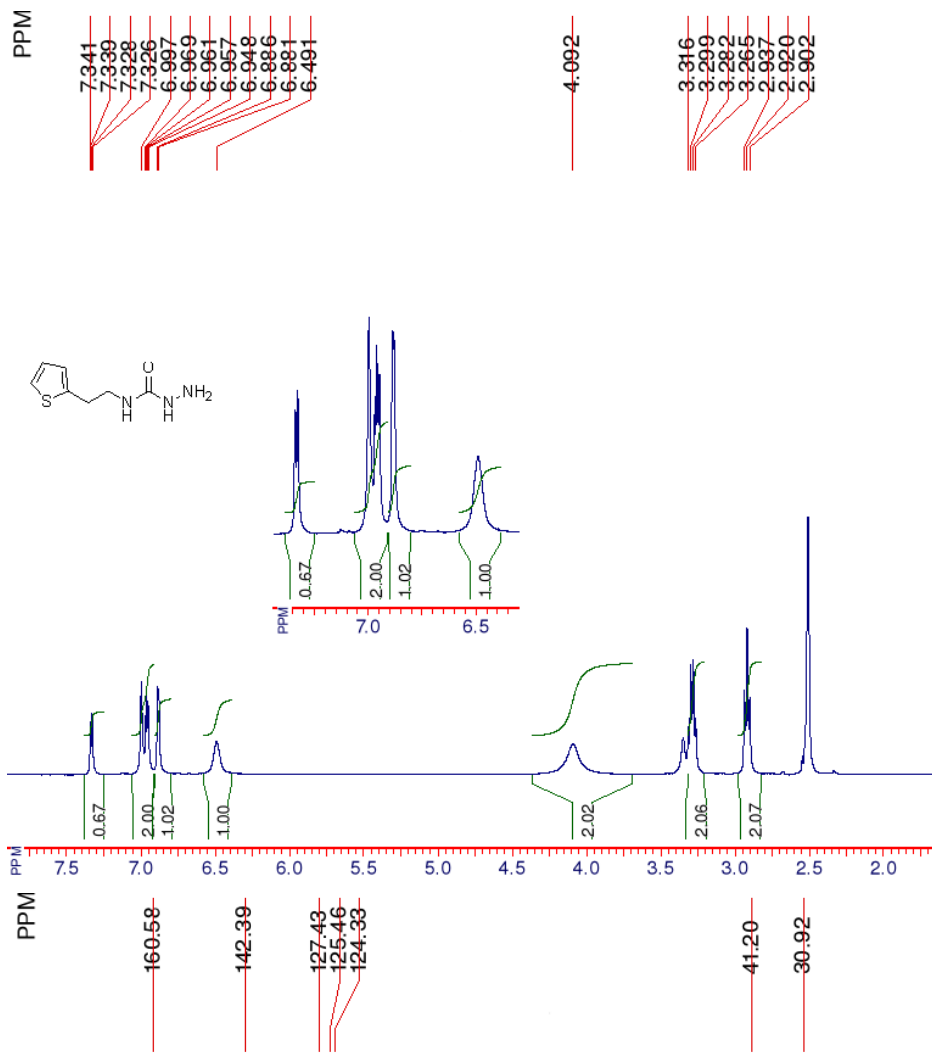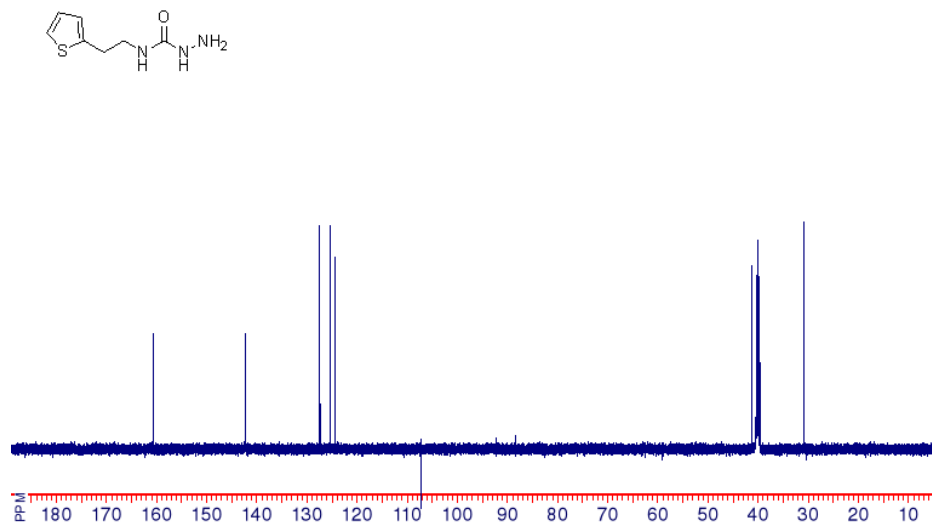

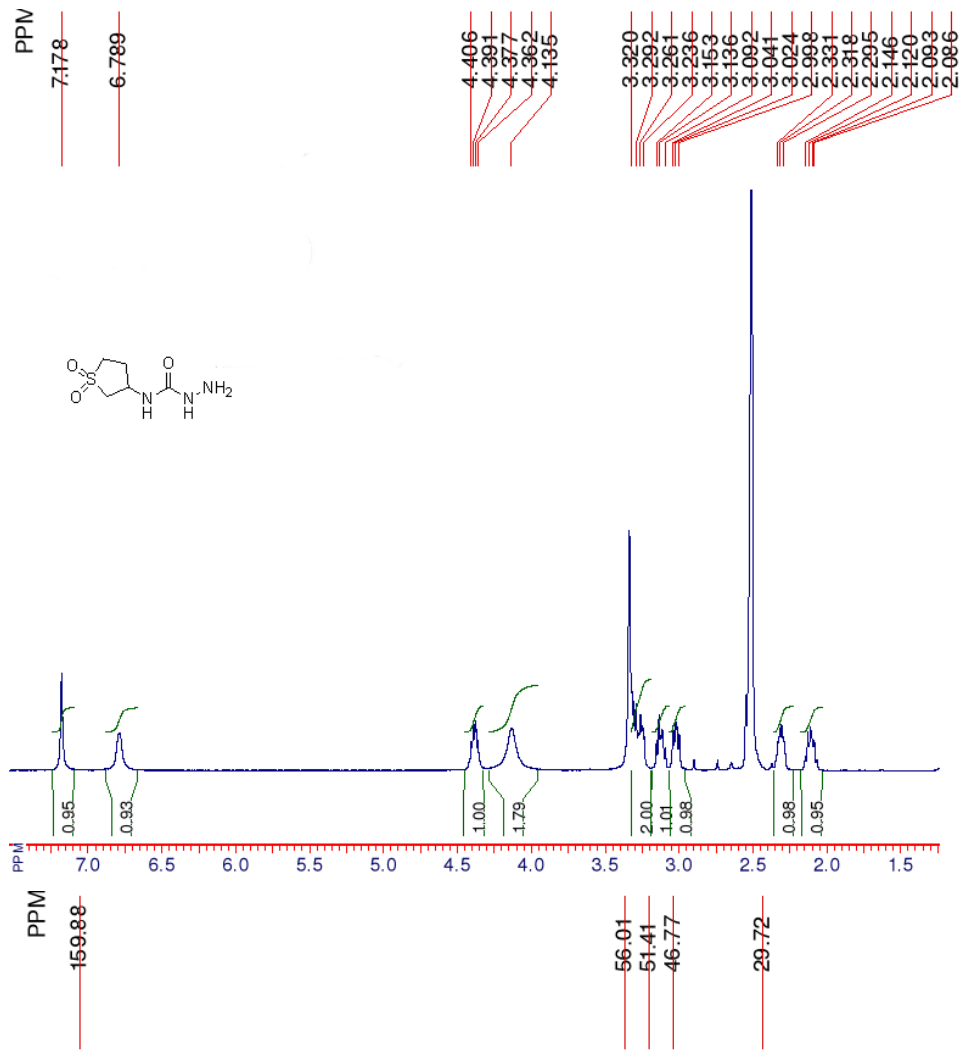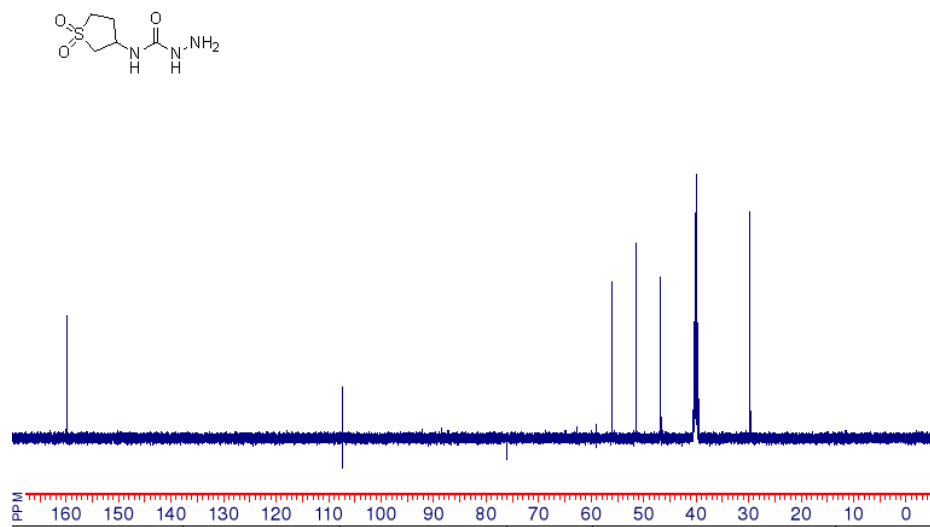



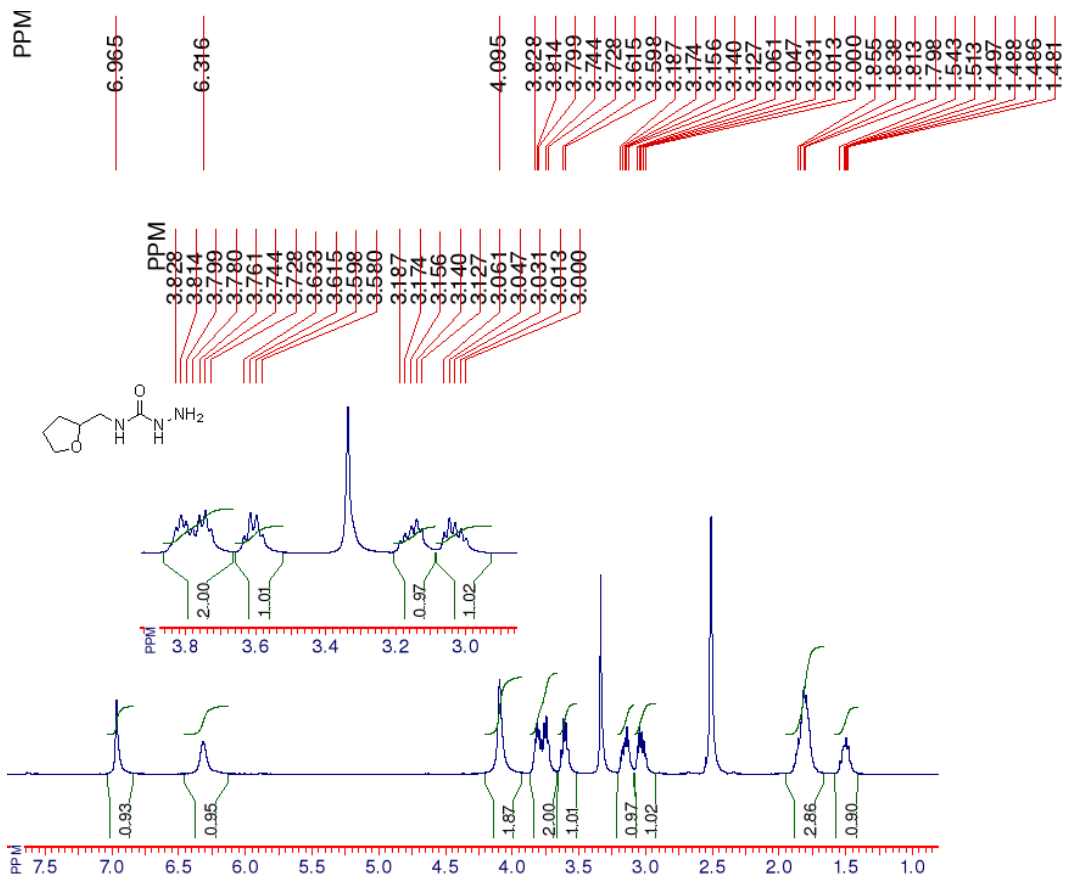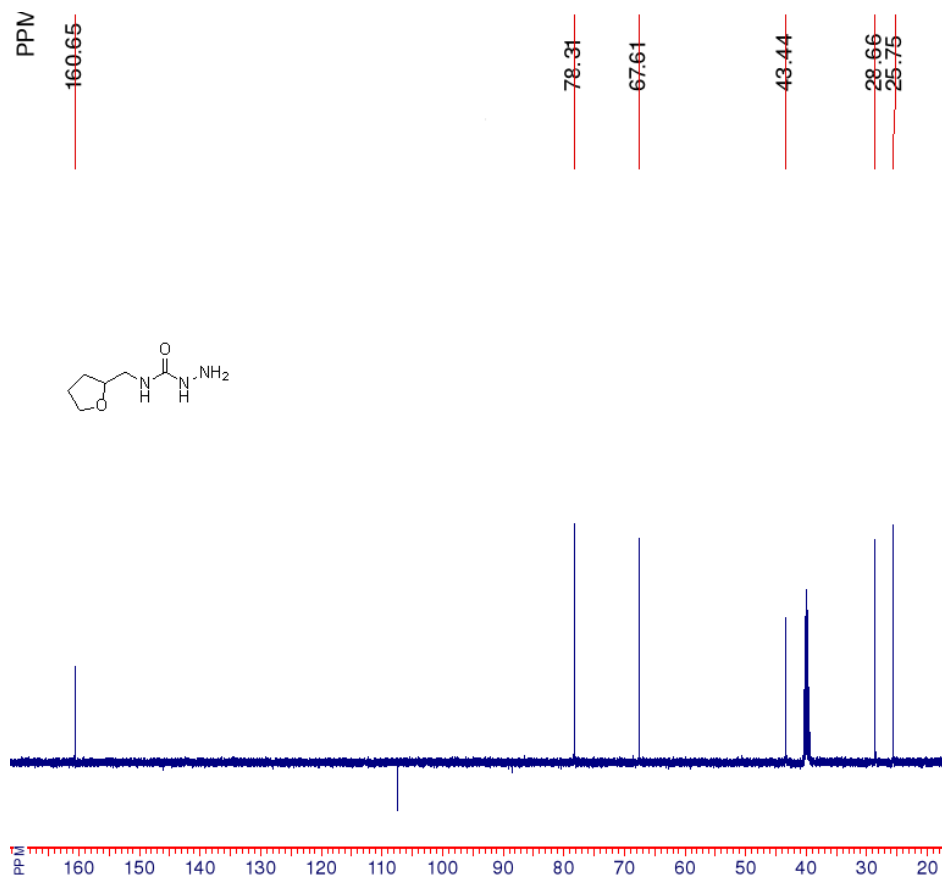

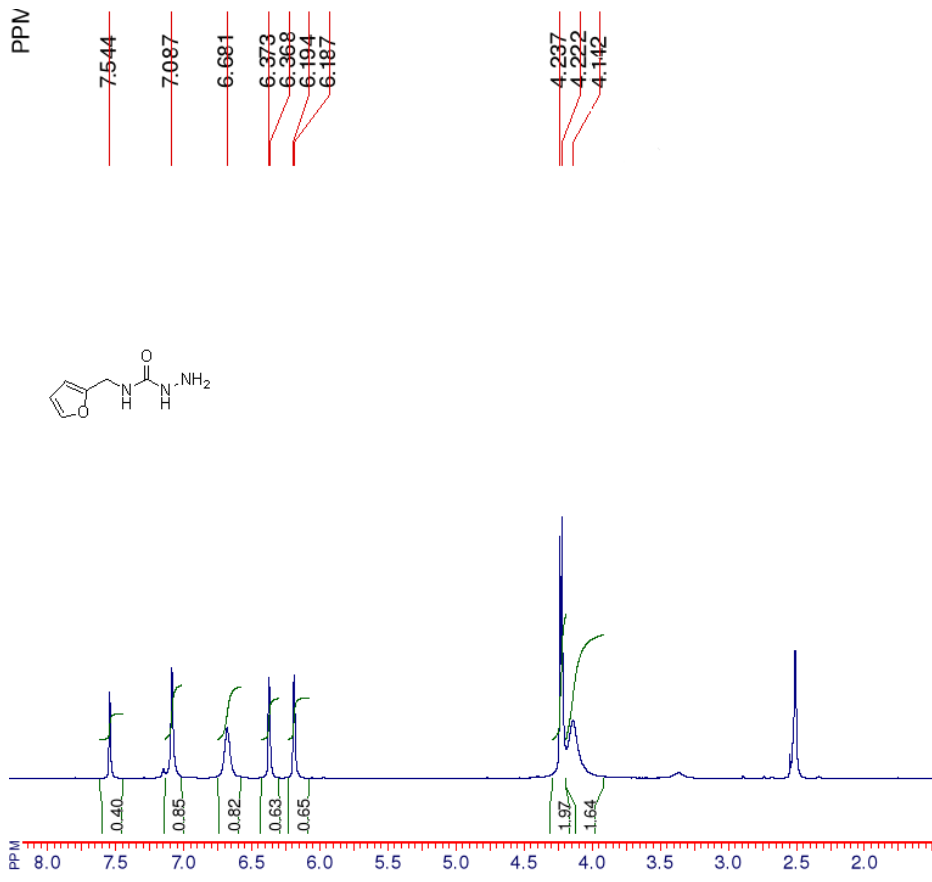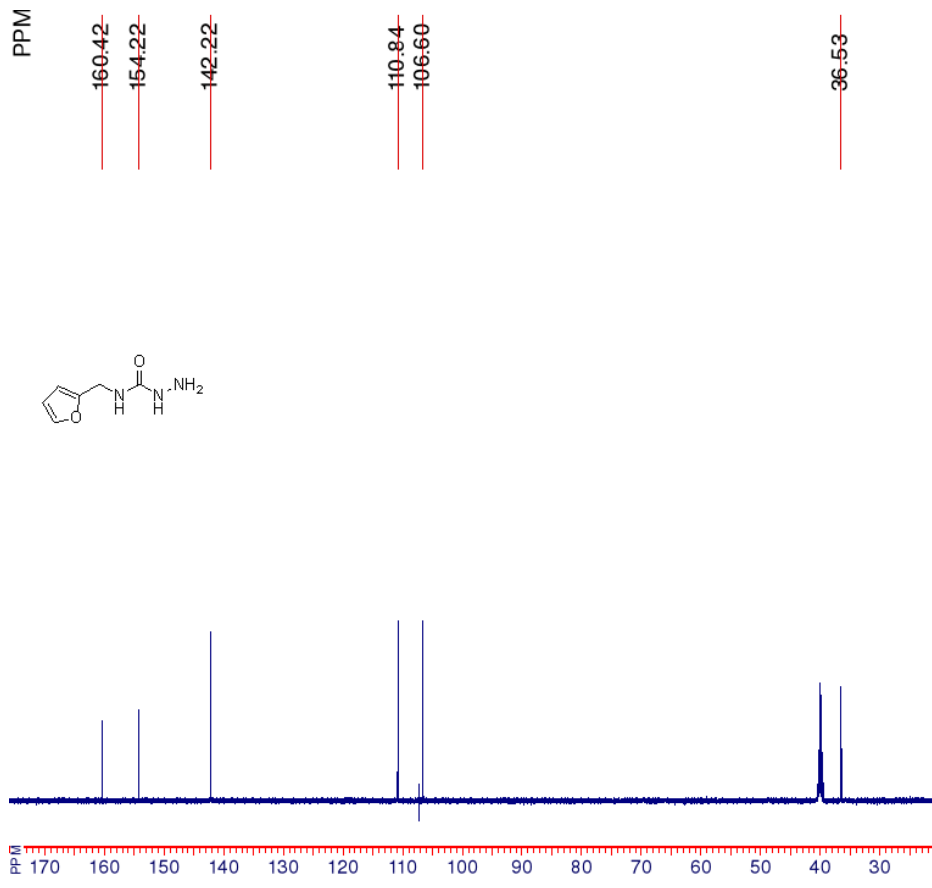

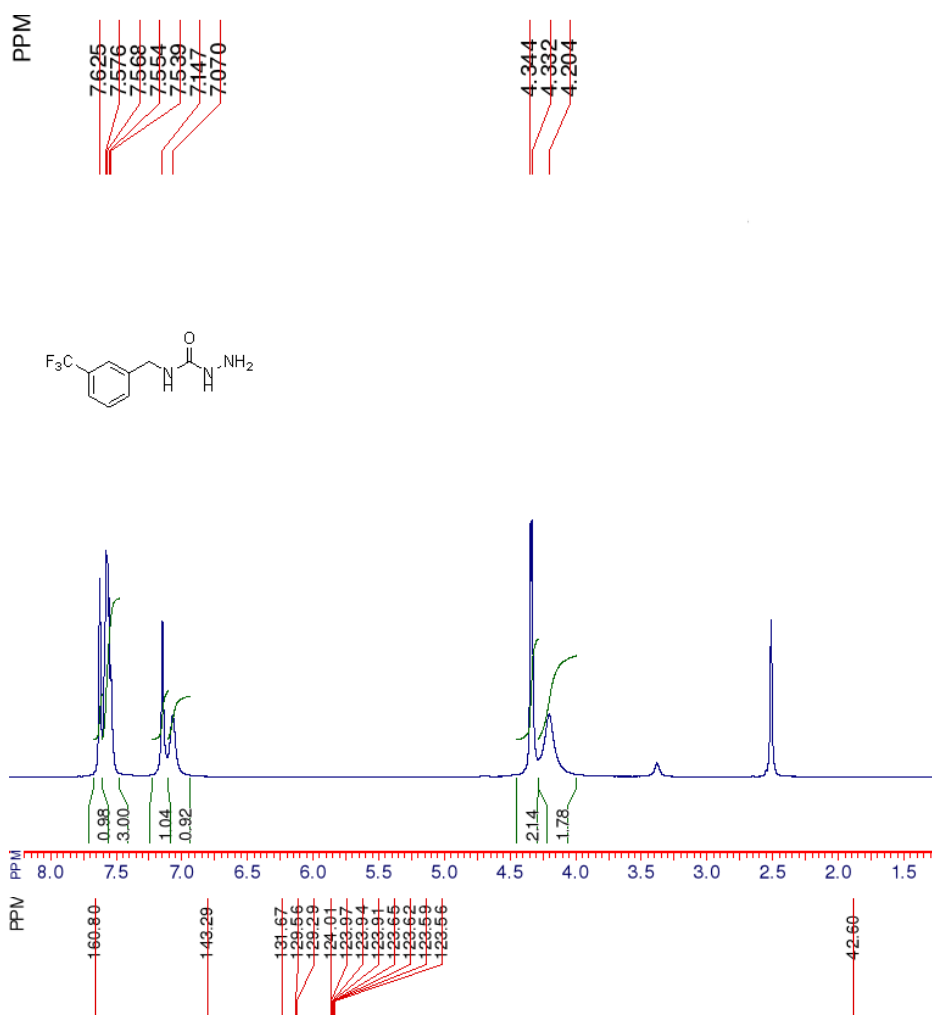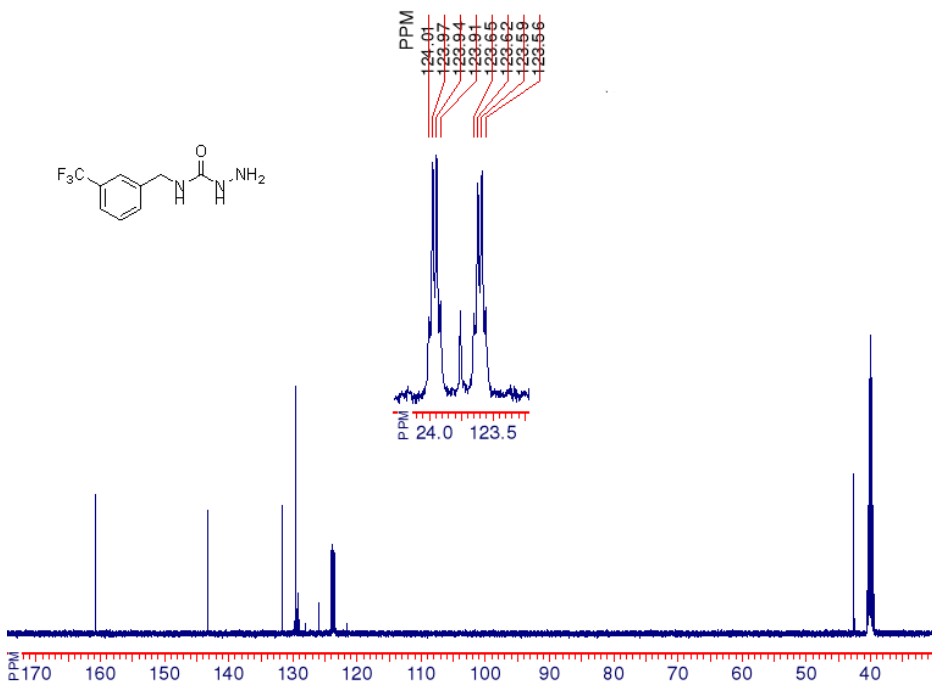

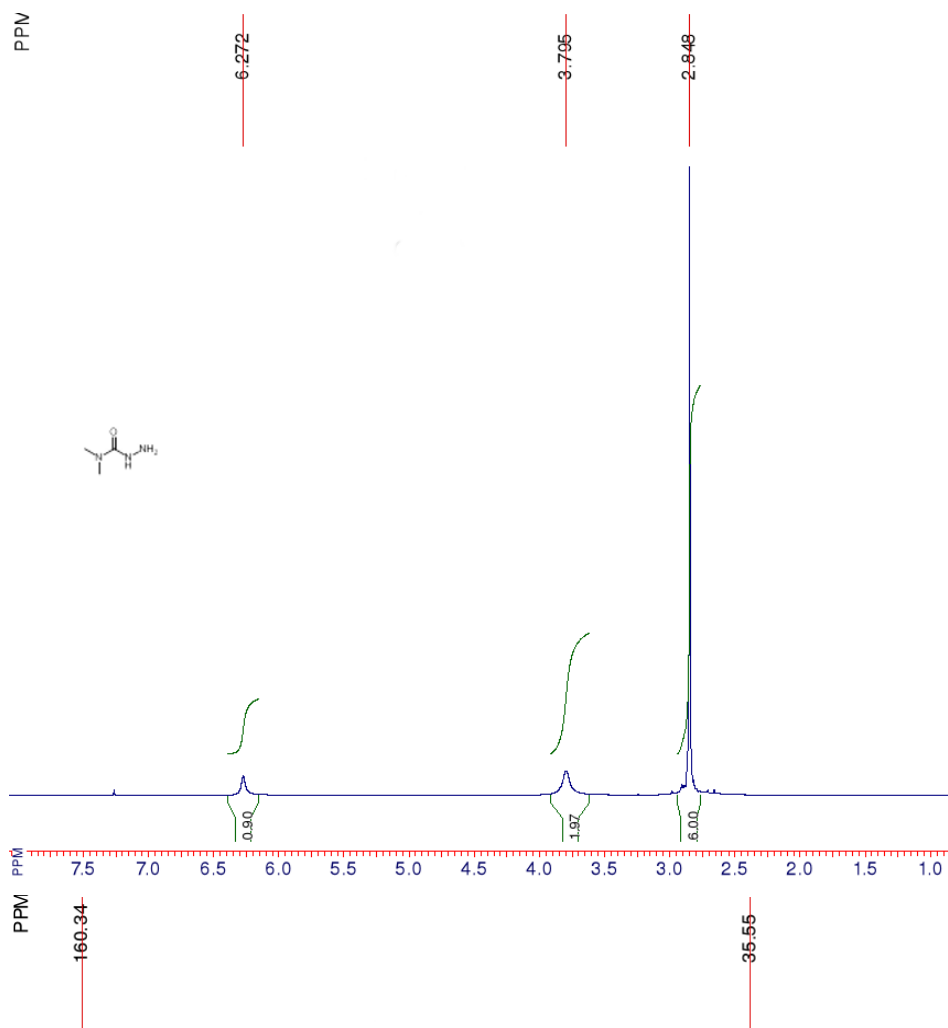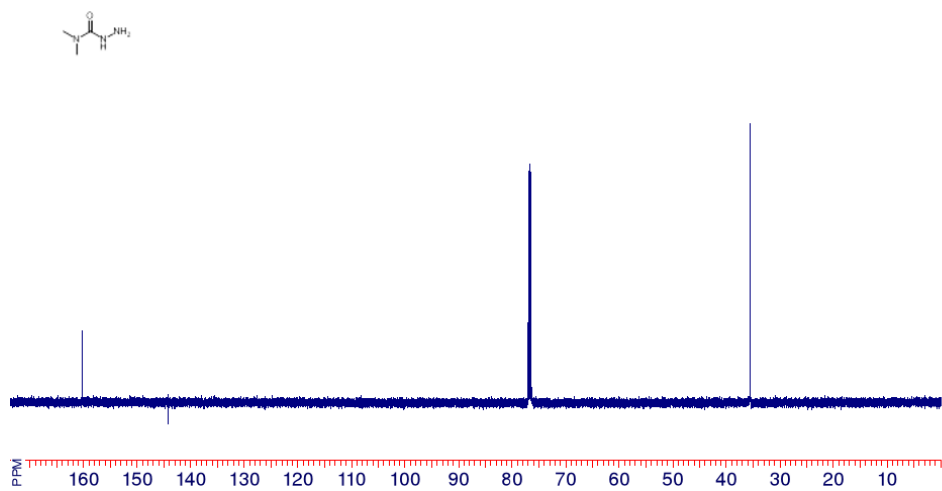

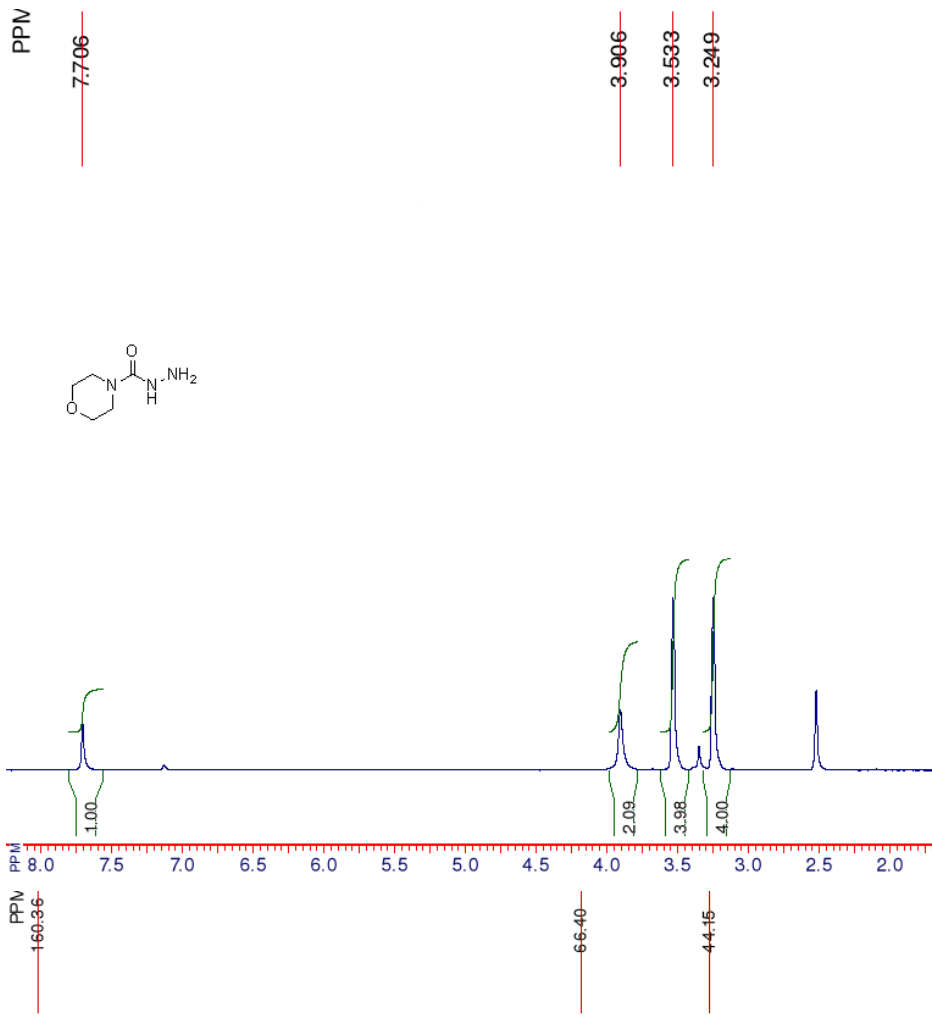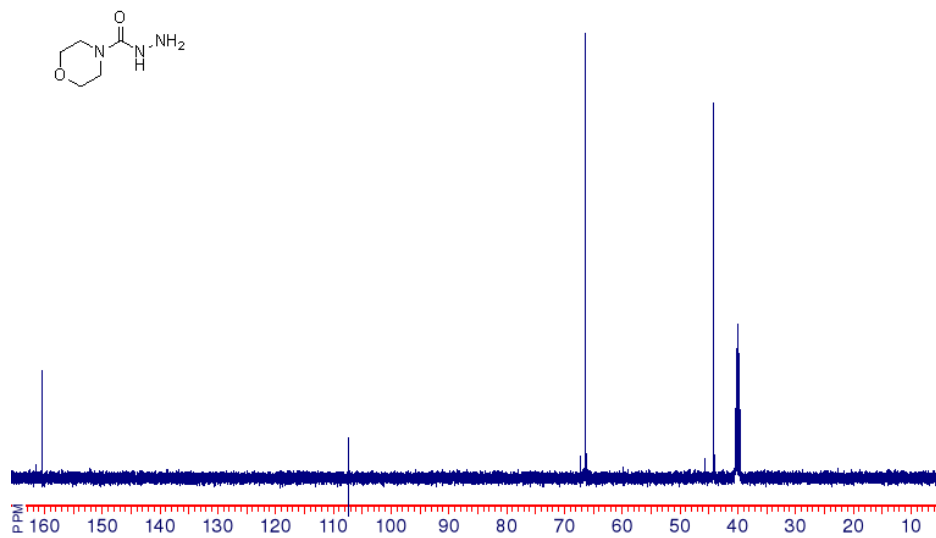

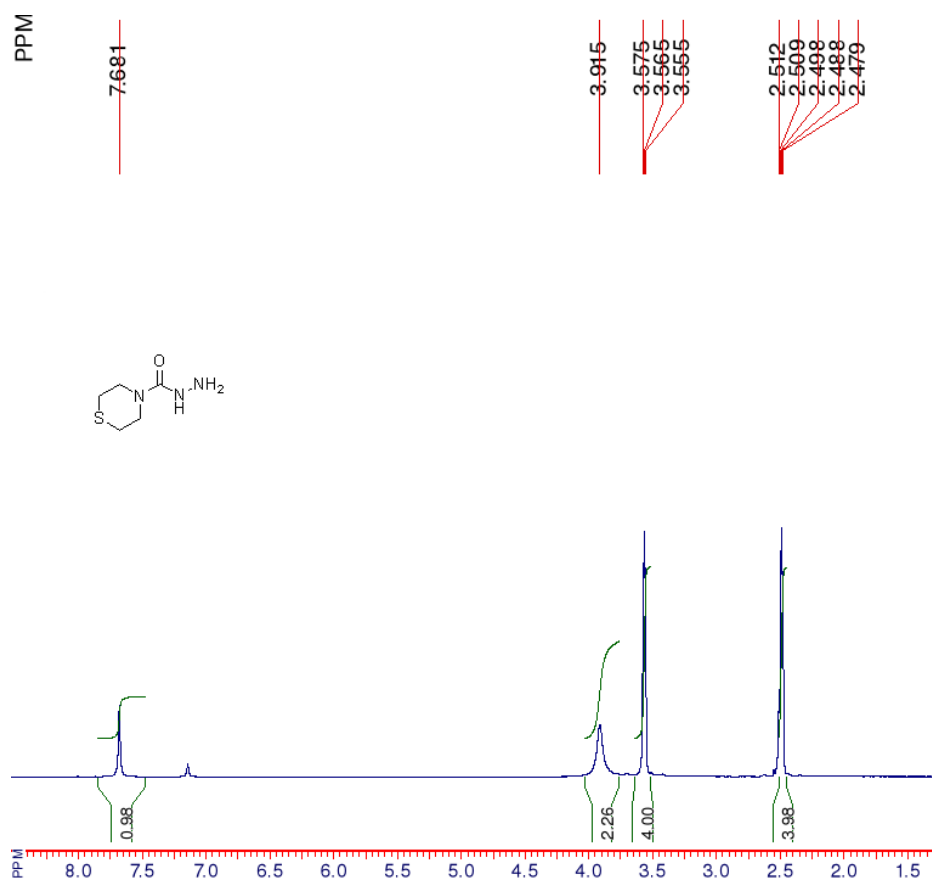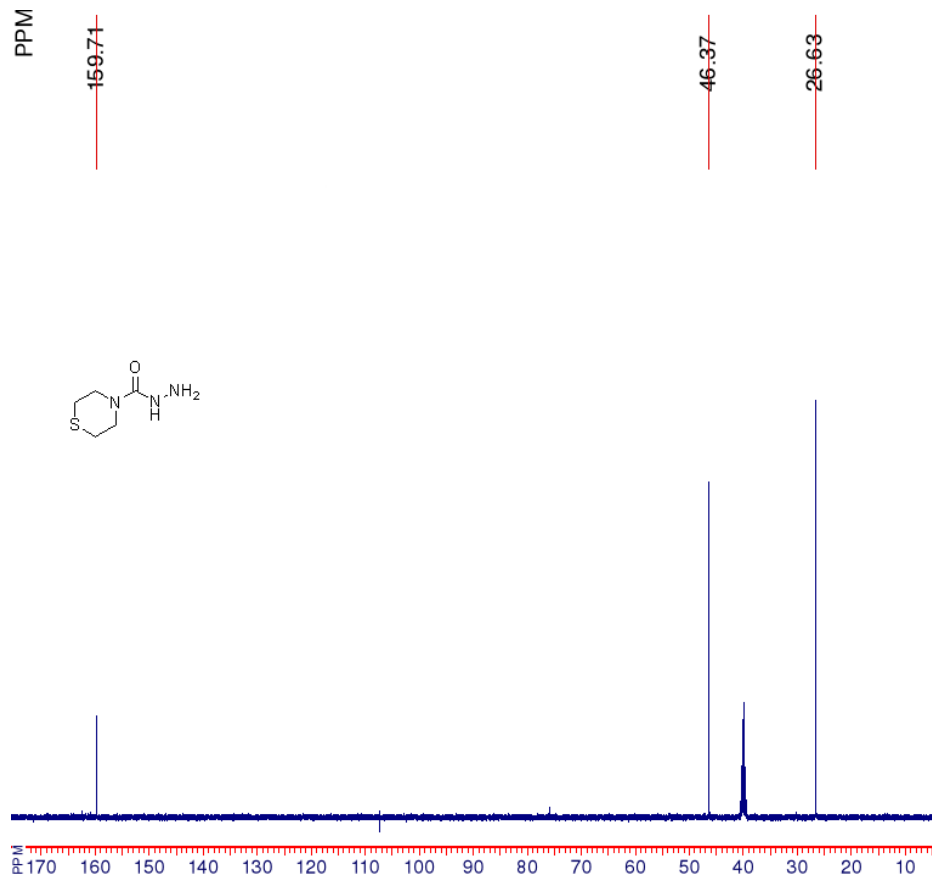

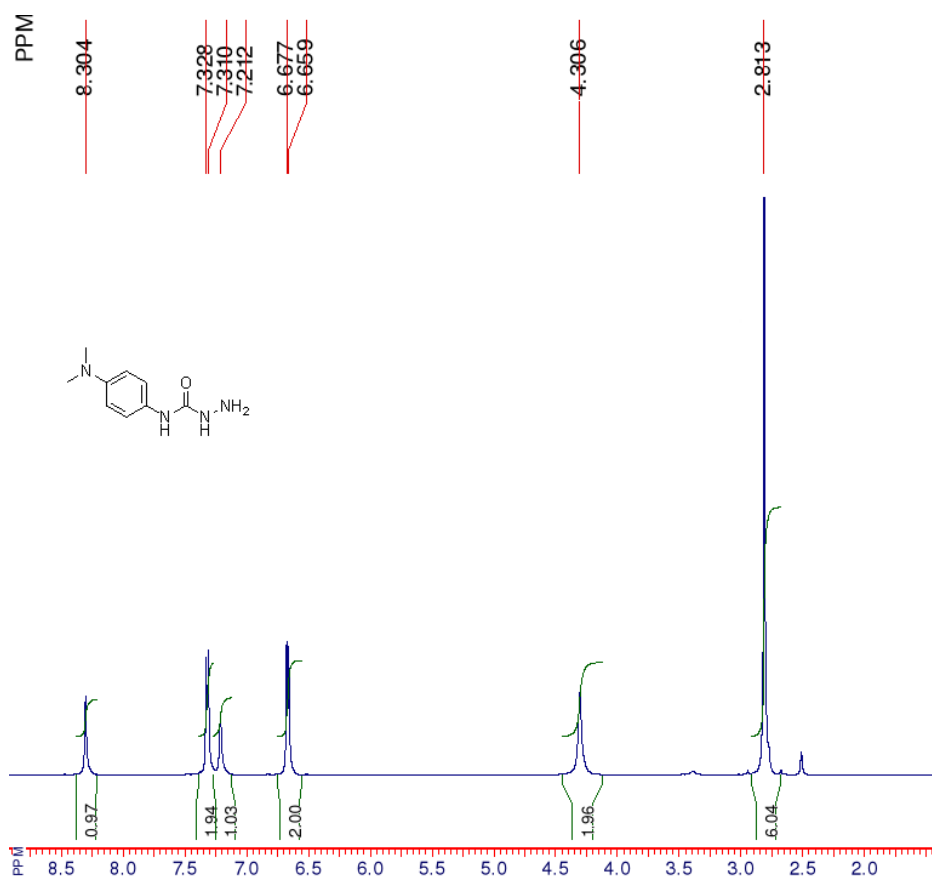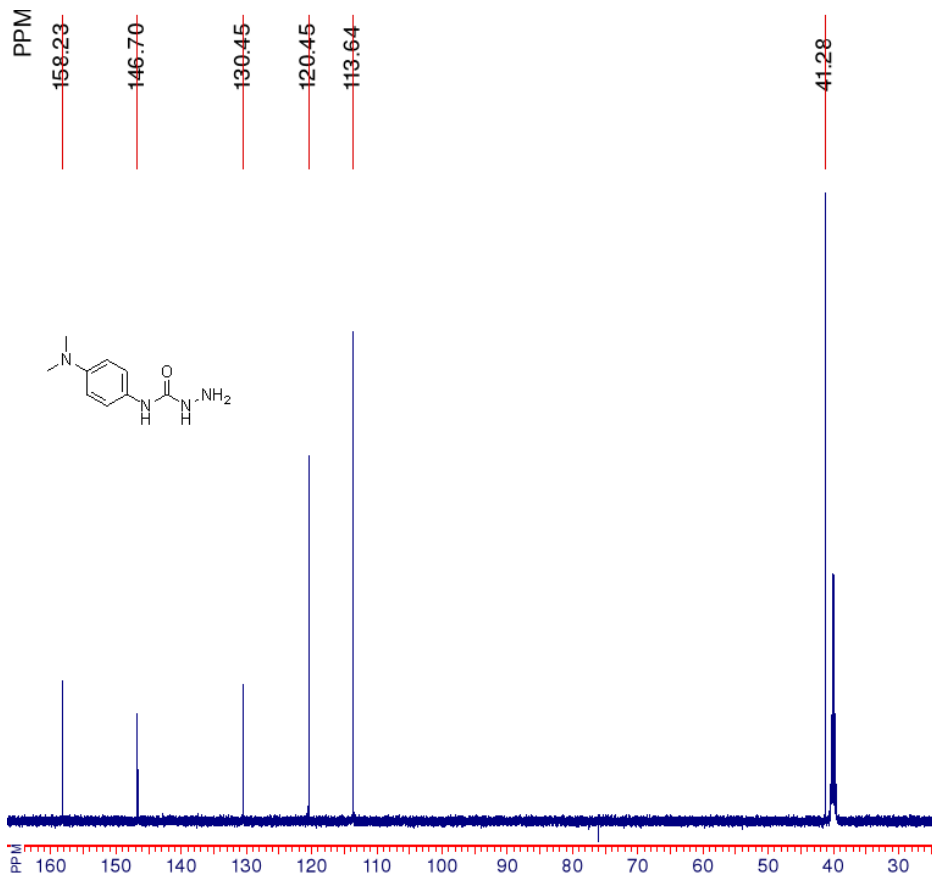

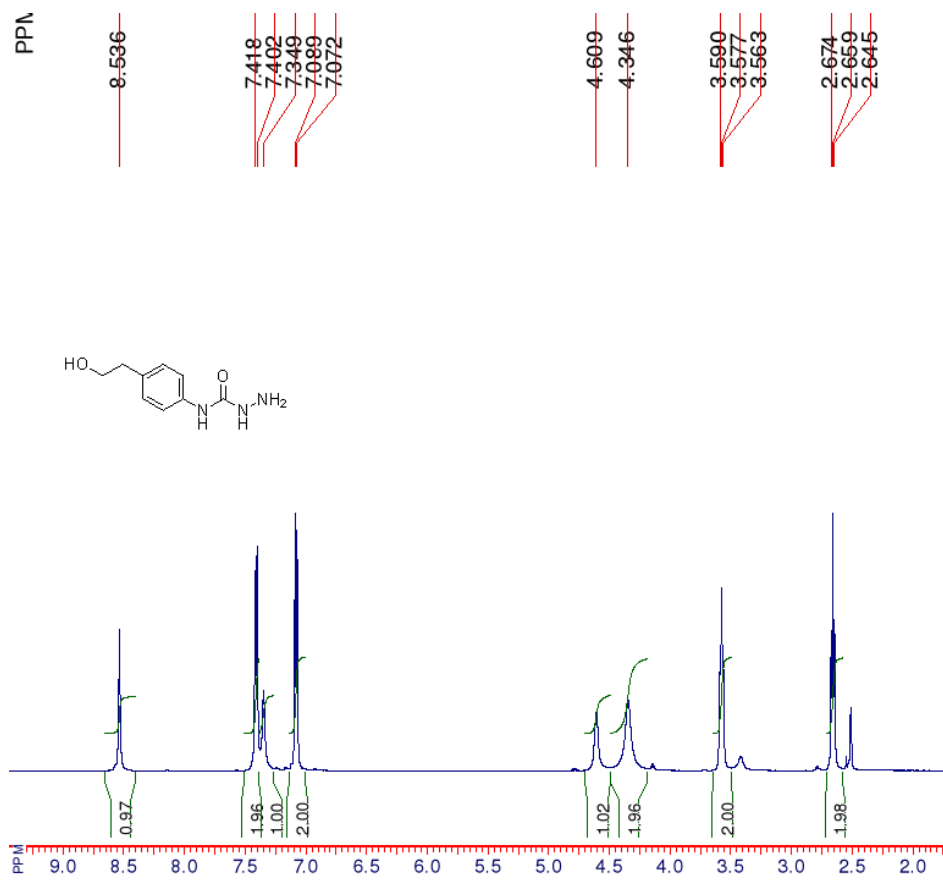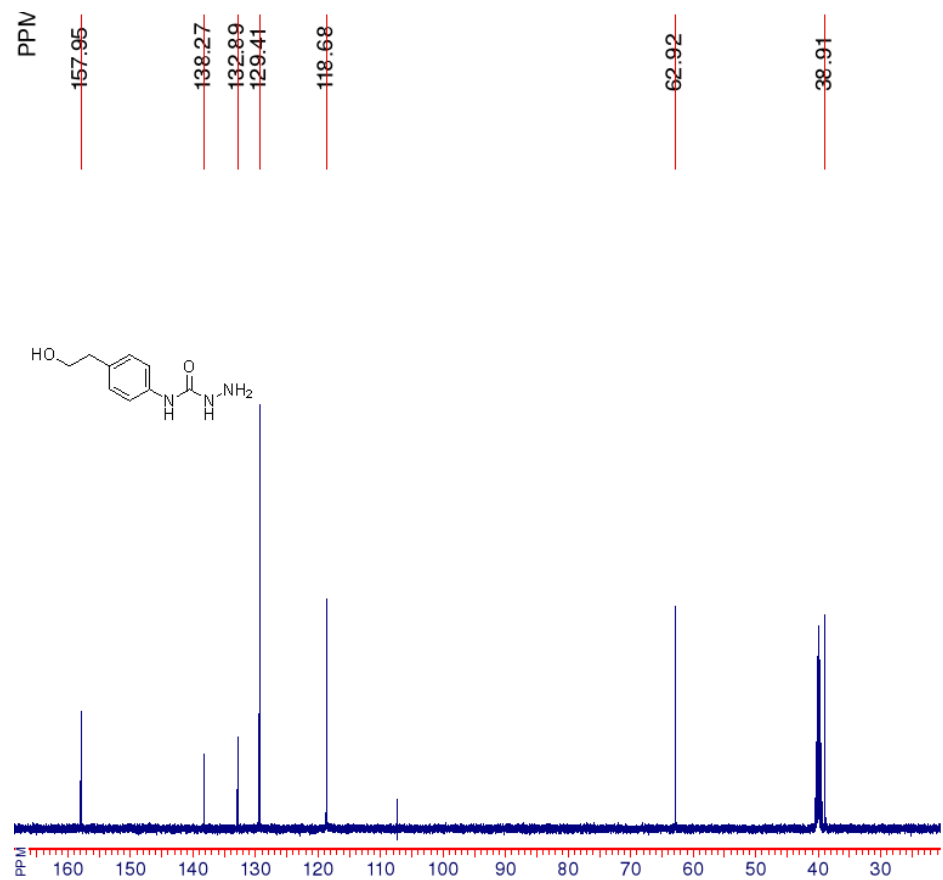



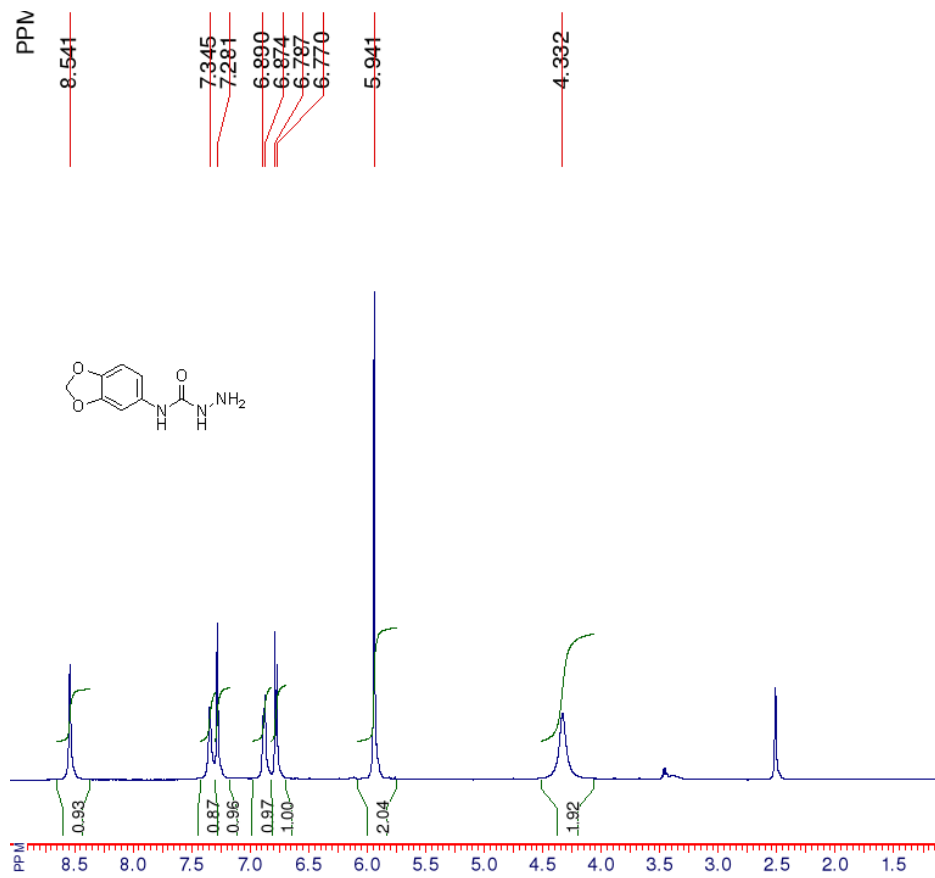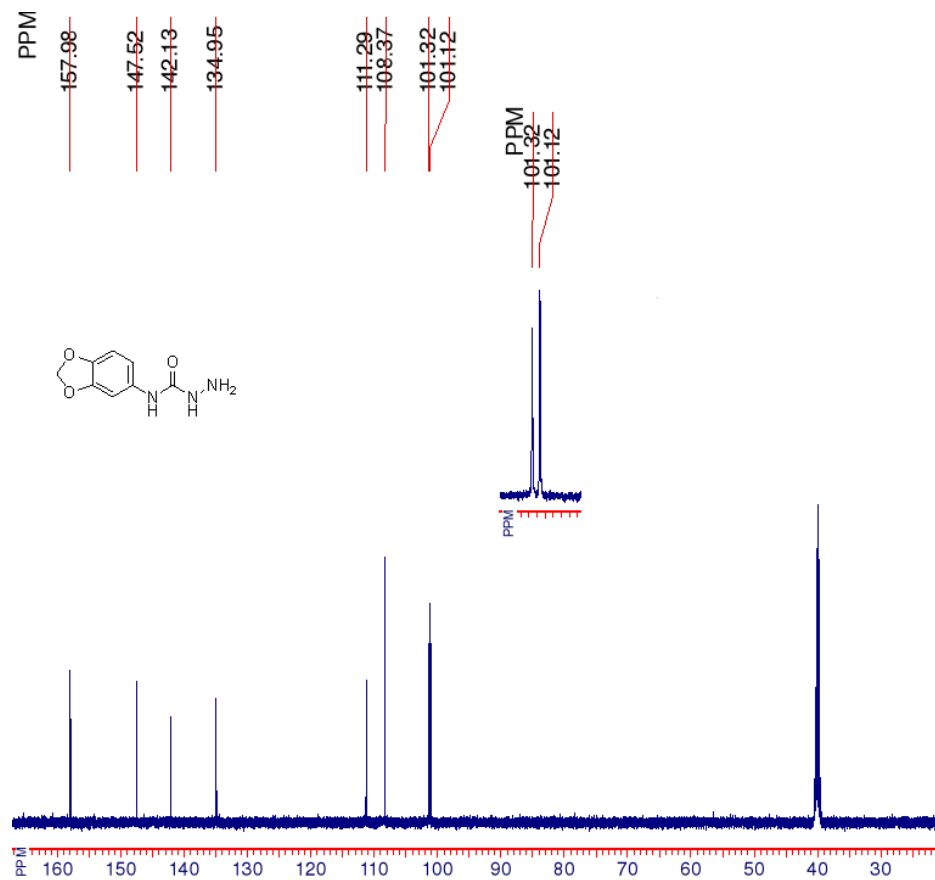

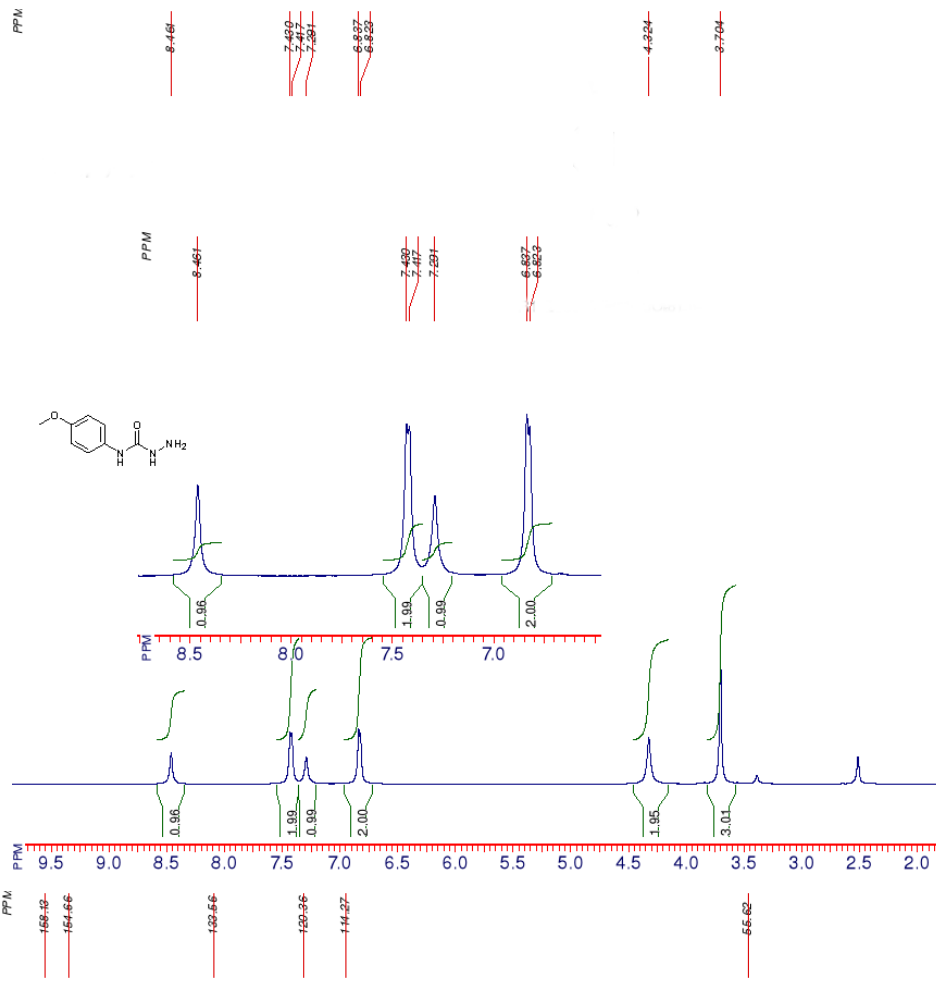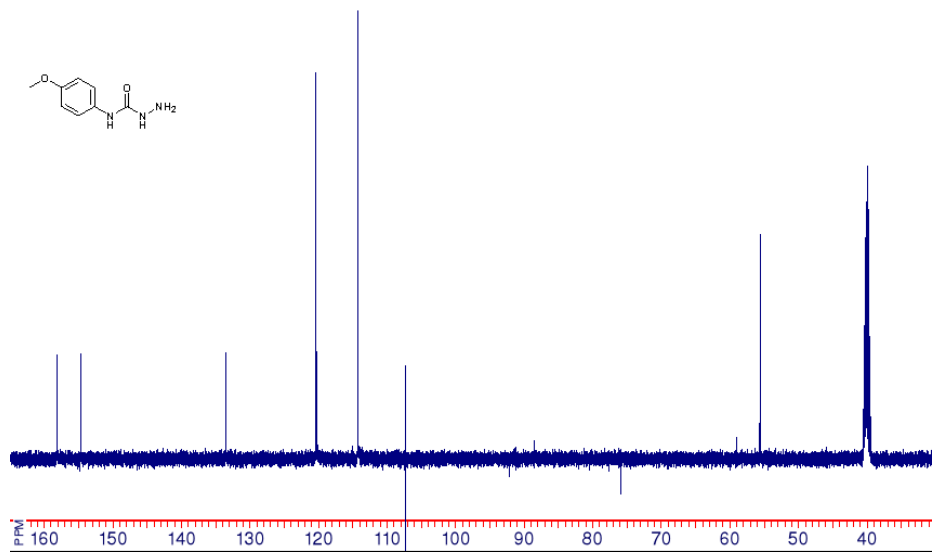

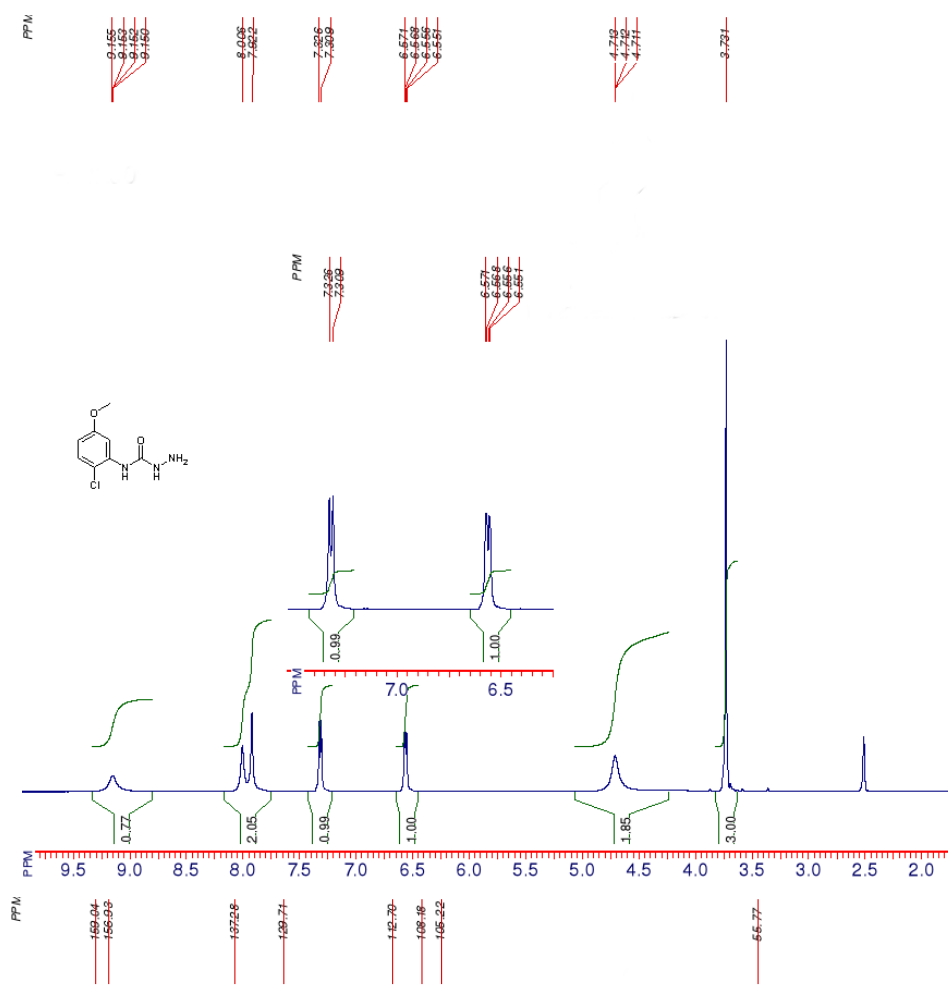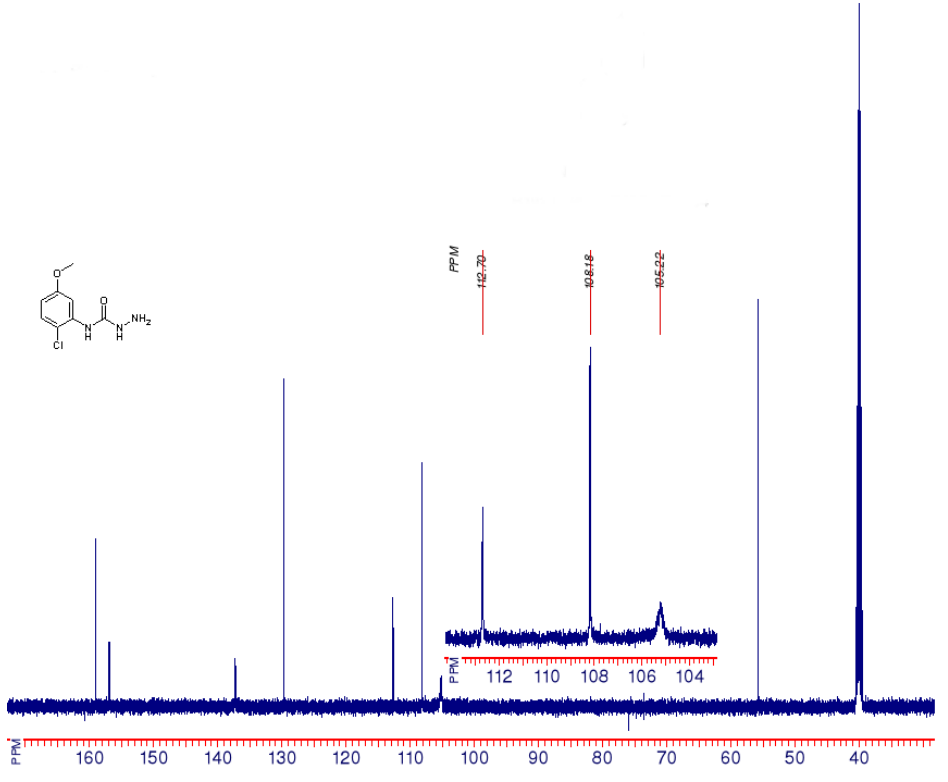

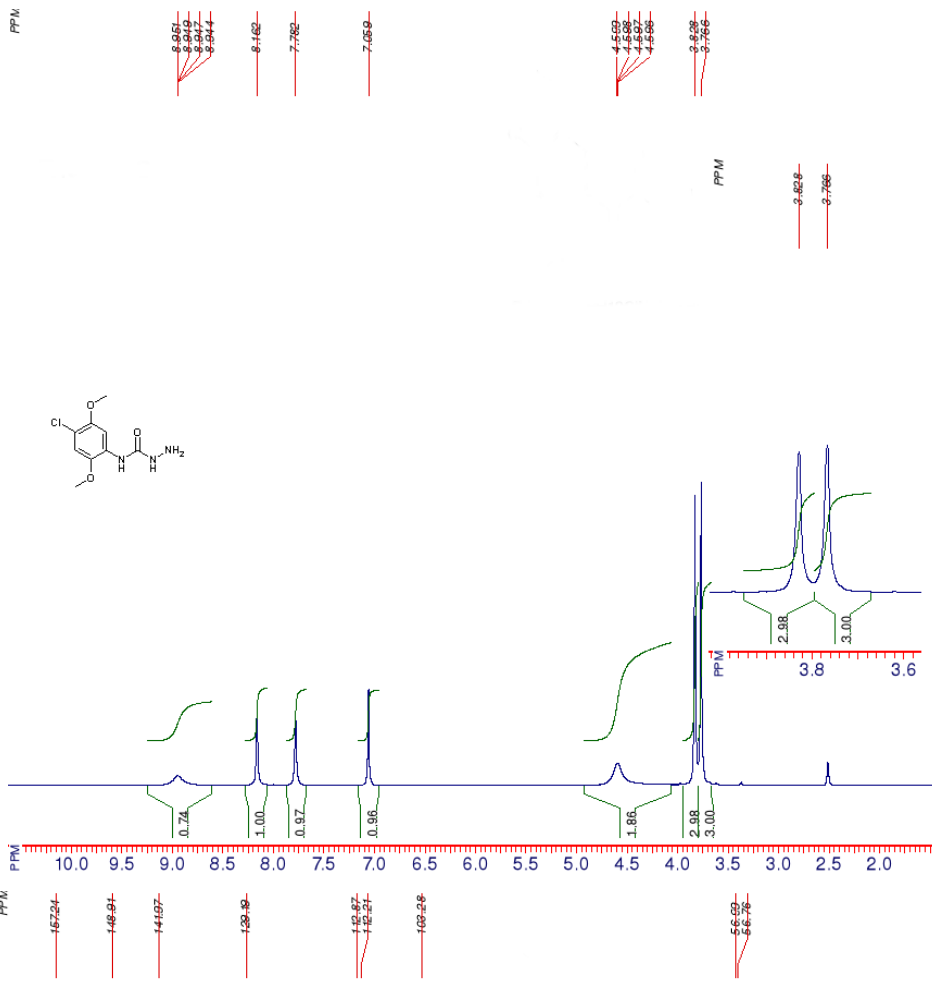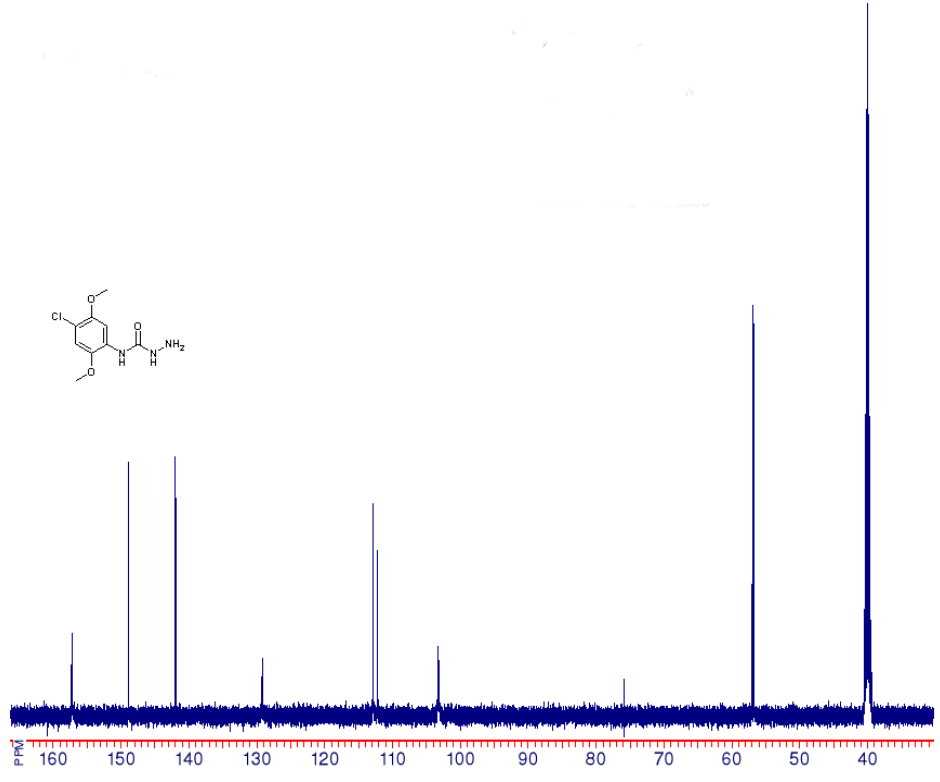

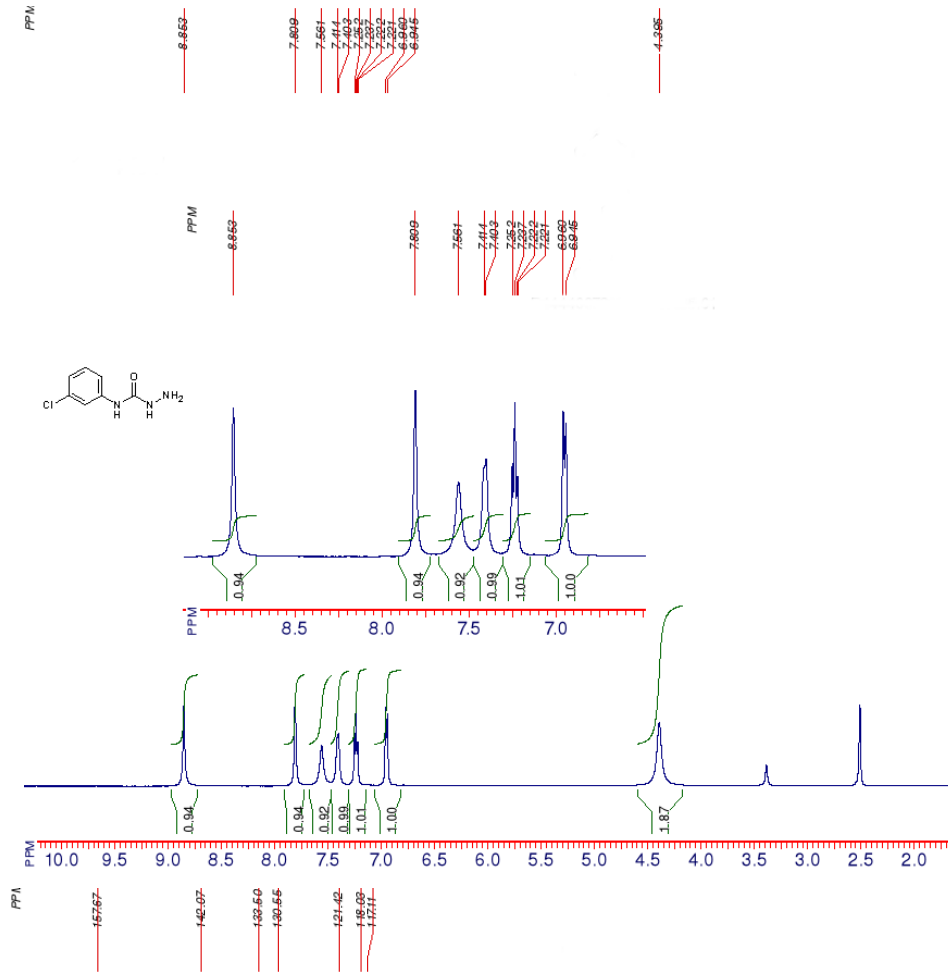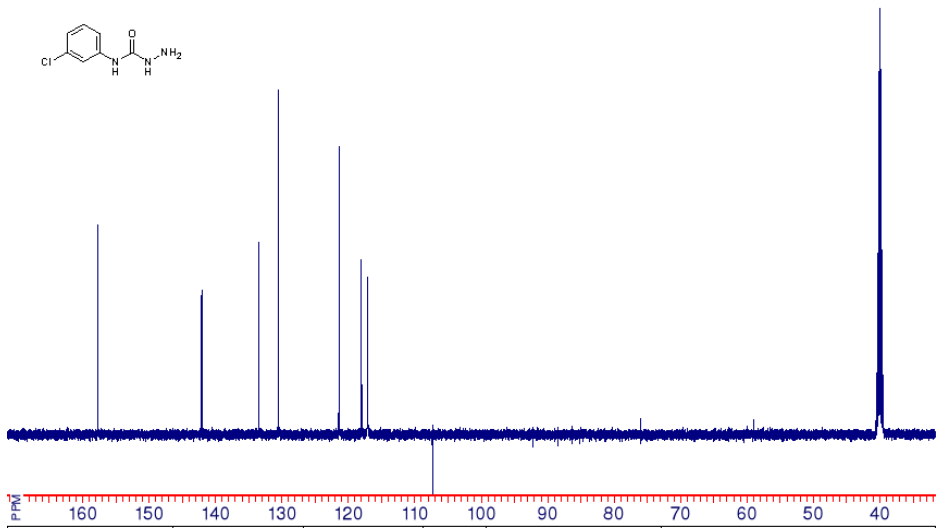

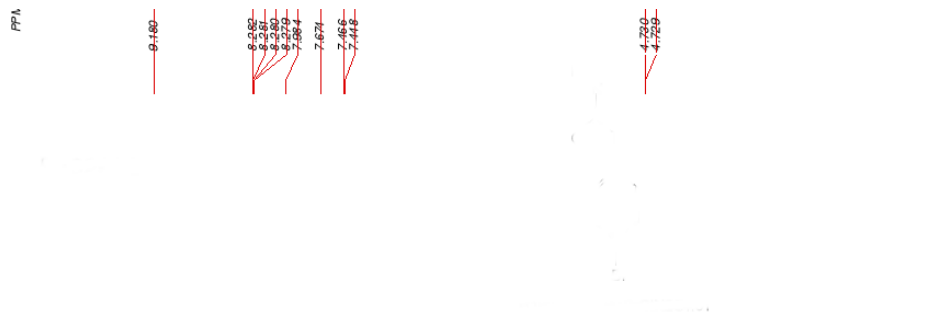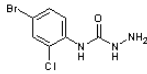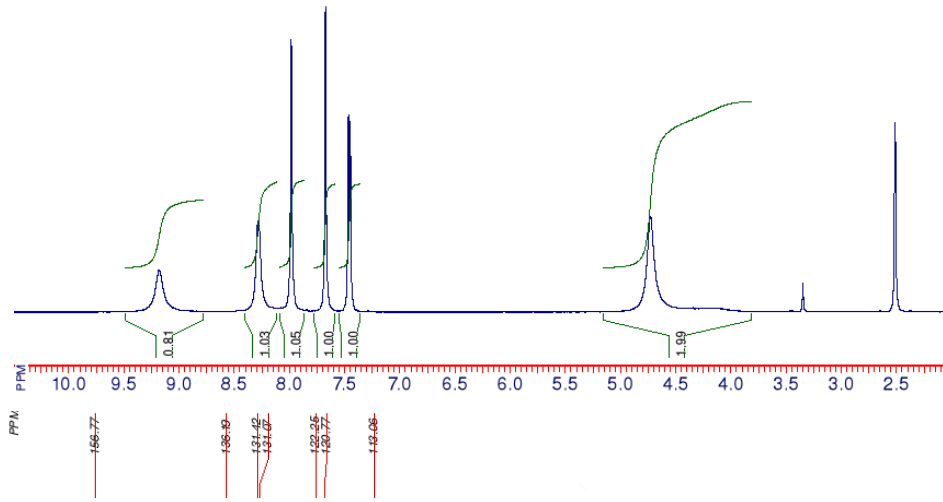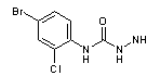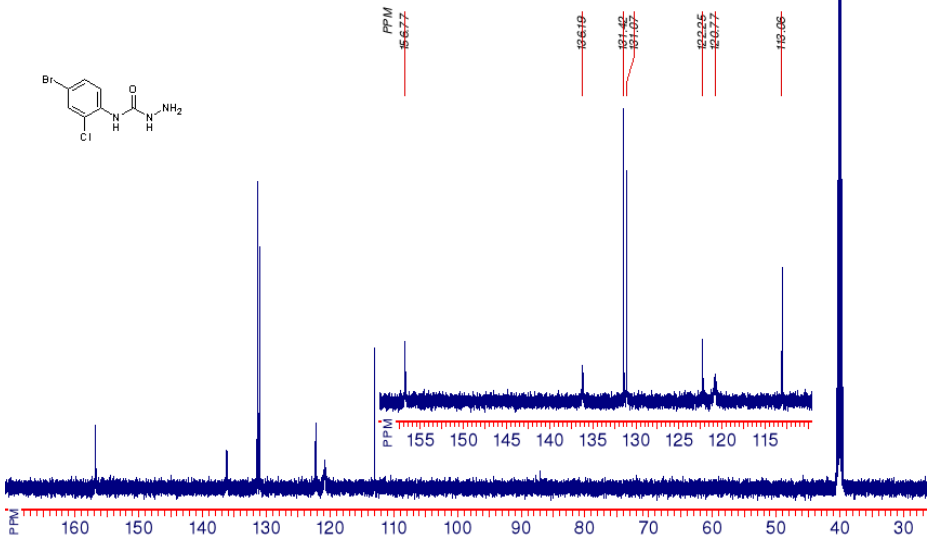

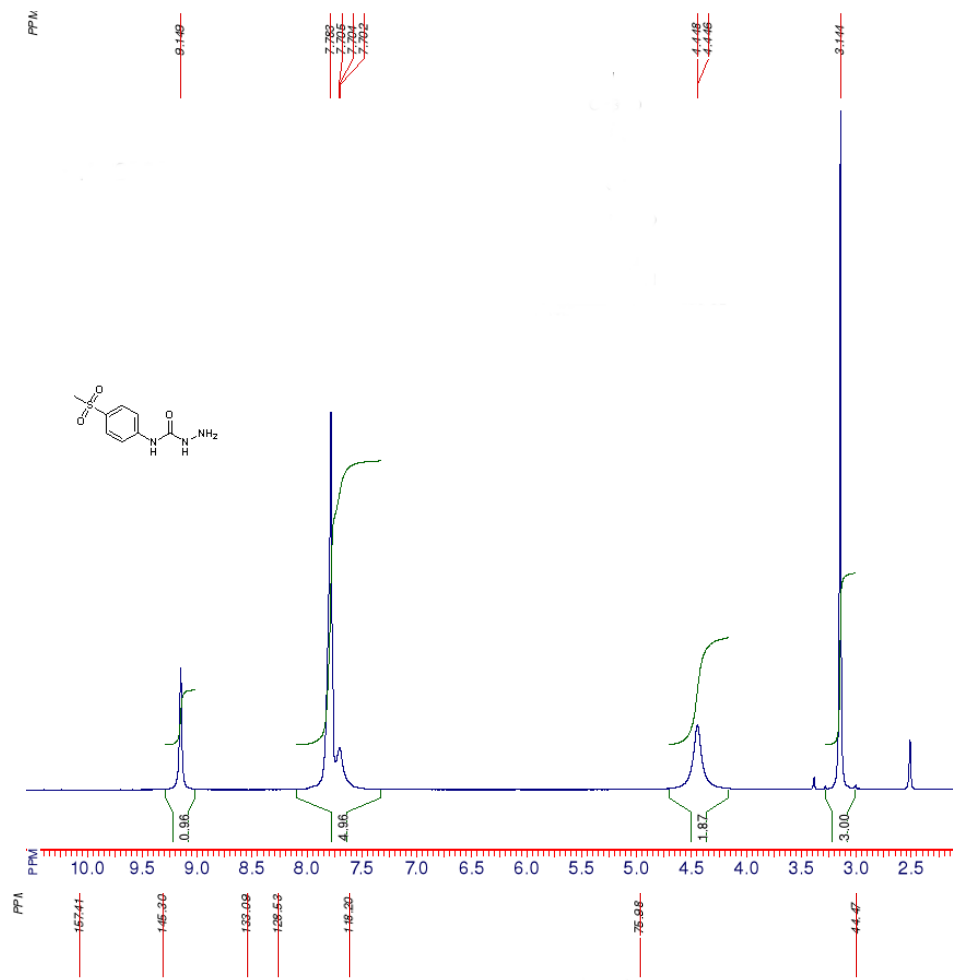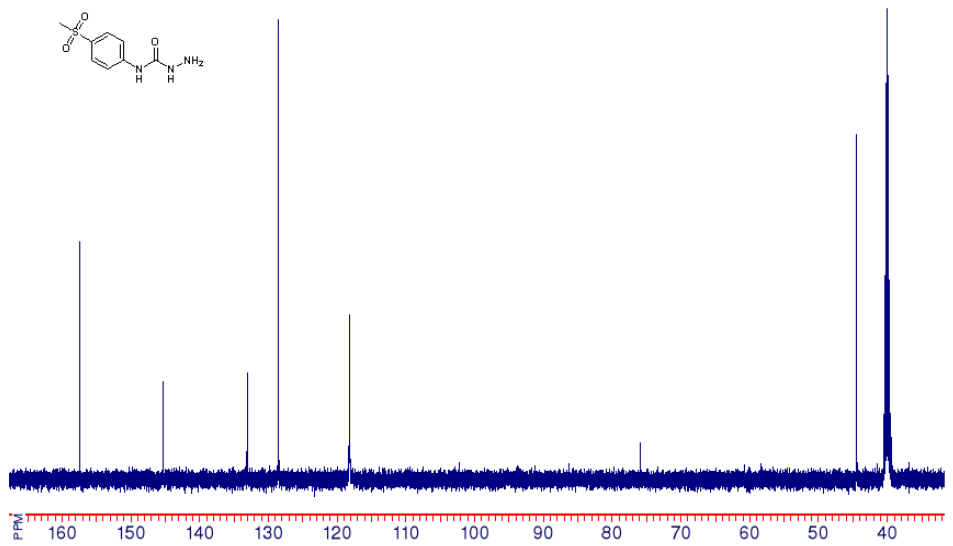

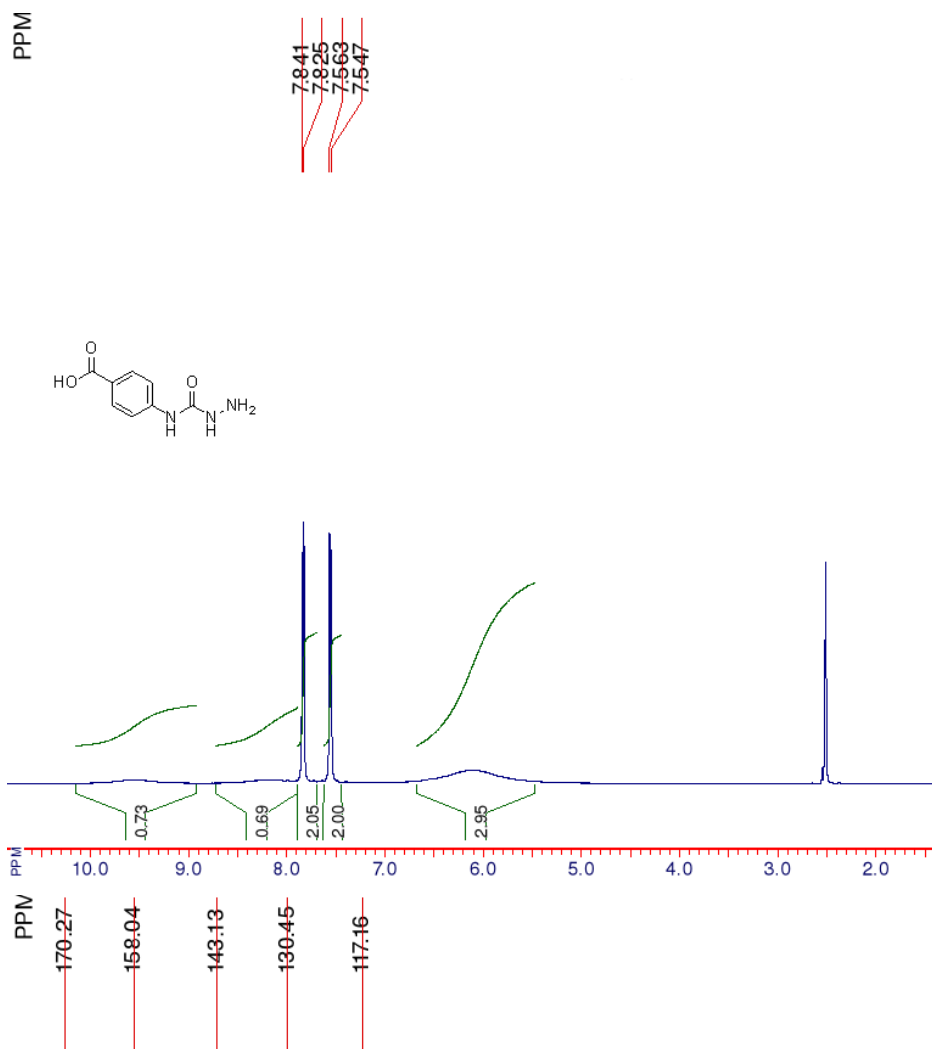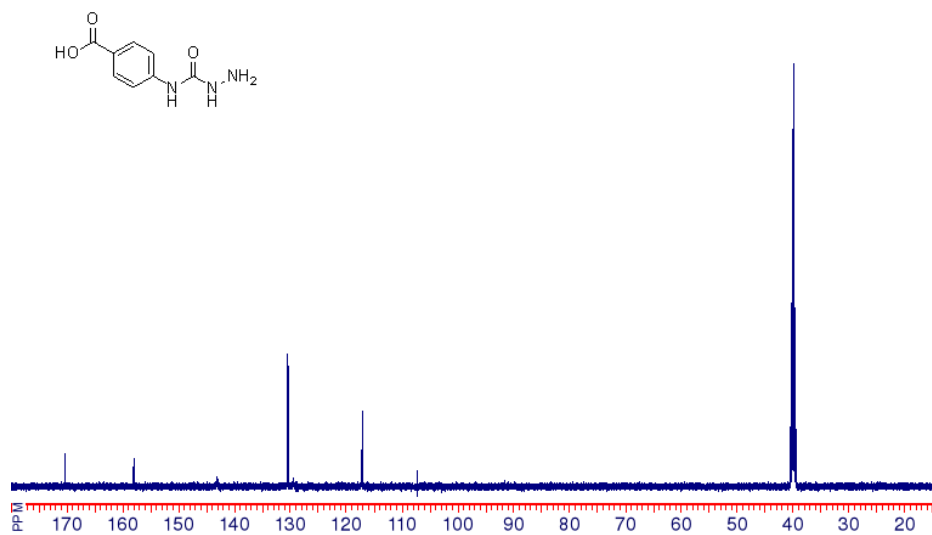



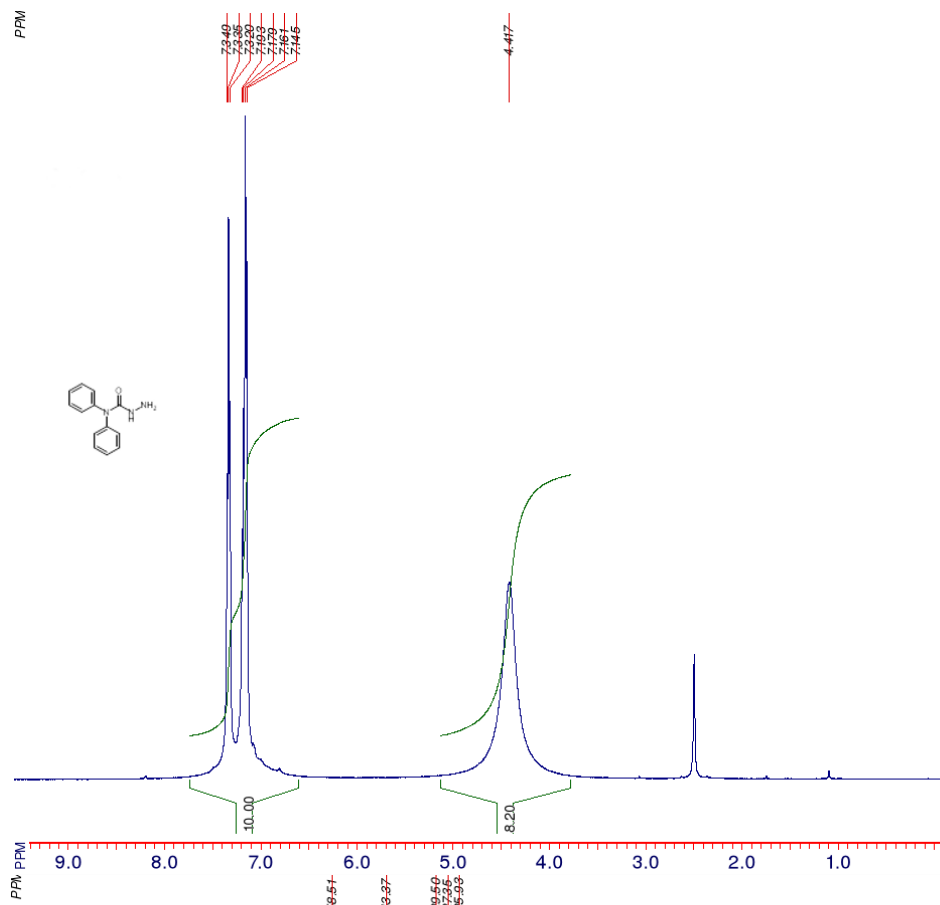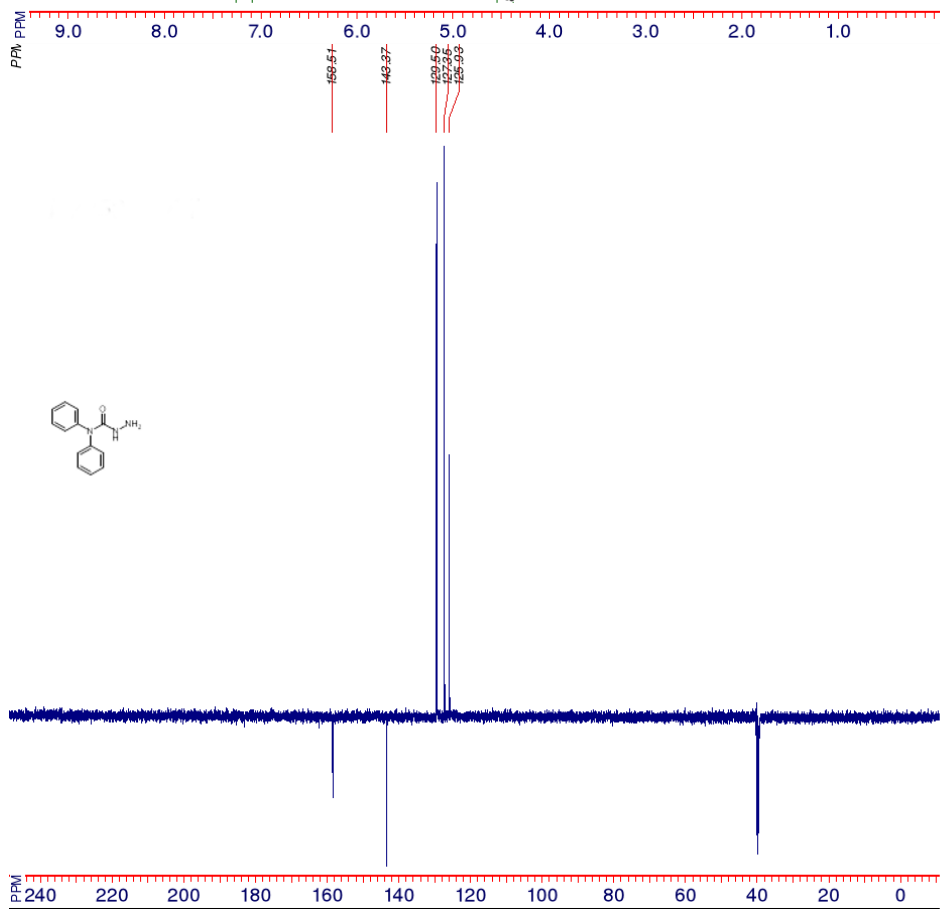

Supplement: c4ra12425a1.pdf [file c4ra12425a1.pdf]
